# Supplementary material for: Modulating electronic and optical properties of monolayered MoS2 by covalent mono- and bisfunctionalization
Source: Royal Society of Chemistry journal article supplement (doi:10.1039/d2tc00391k), 2022-01-01
Supplement: d2tc00391k1.pdf [file d2tc00391k1.pdf]

Supporting Information (SI)

## Modulating Electronic and Optical Properties of Monolayered MoS<sub>2</sub> by Covalent Mono- and Bisfunctionalization

Kangli Wang\*, Marco Kapitzke, Lauren Green, and Beate Paulus

*Institut für Chemie und Biochemie, Freie Universität Berlin, Arnimallee 22, 14195 Berlin, Germany*

E-mail: klwang0329@zedat.fu-berlin.de

### Content:

**Fig. S1:** (a) The QP band gaps of the functionalized 2H-MoS<sub>2</sub> with -CH<sub>3</sub> group as a function of vacuum thickness with 50 eV G<sub>0</sub>W<sub>0</sub> self-energy and 12×12 k-point sampling (2×2 supercell). (b) The QP band gaps of the functionalized 2H-MoS<sub>2</sub> with -CH<sub>3</sub> group as a function of k-point sampling with 50 eV G<sub>0</sub>W<sub>0</sub> self-energy and 8 Å vacuum thickness (2×2 supercell). (c) Optical absorption spectra of the functionalized 2H-MoS<sub>2</sub> with -CH<sub>3</sub> group as a function of the number of valence and conduction bands with 50 eV self-energy and 8 Å vacuum thickness (2×2 supercell).

**Fig. S2:** Optimized structures of functionalized 2H-MoS<sub>2</sub> and 1T'-MoS<sub>2</sub> with various groups.

**Fig. S3:** Average energy difference  $\Delta E$  between functionalized 2H- and 1T'-MoS<sub>2</sub> as a function of the group coverage. Here  $\Delta E = (E_{1T'} - E_{2H})/m$ , where  $m$  is the number of MoS<sub>2</sub> units,  $E_{1T'}$  and  $E_{2H}$  are the total energy of functionalized 2H- and 1T'-MoS<sub>2</sub> for a given coverage, respectively. The positive  $\Delta E$  indicates that functionalized 2H-MoS<sub>2</sub> is more stable, while the negative  $\Delta E$  indicates that functionalized 1T'-MoS<sub>2</sub> is more stable.

**Fig. S4:** Average Bader charge transfer  $\Delta Q$  as a function of the group coverage with respect to the 2H- and 1T'-MoS<sub>2</sub> monolayers. Here  $\Delta Q = \sum_i^N (Z_i - Q_i^{Bader})/n$ , where  $N$  is the total number of atoms in the attached groups,  $Z_i$  is the number of electrons of atom  $i$ ,  $Q_i^{Bader}$  is the Bader charge of atom  $i$  and  $n$  is the number of functional groups. A positive charge transfer value indicates electron flow from the substrate to the functional group.

**Fig. S5:** DFT band gaps as a function of the group coverage with respect to the functionalized 2H-MoS<sub>2</sub> and 1T'-MoS<sub>2</sub> monolayers.

**Fig. S6:** Total density of states and the projected density of states for the functionalized (a) 2H-MoS<sub>2</sub> and (b) 1T'-MoS<sub>2</sub> calculated by PBE functional.

**Fig. S7:** Optical absorption spectra of the functionalized 1T'-MoS<sub>2</sub> monolayer.

**Table S1:** The optical band gap ( $E_{opt}$ ) for the functionalized 2H-MoS<sub>2</sub> at 6.25% coverage. Energies are in eV.

Fig. S1: (a) The QP band gaps of the functionalized 2H-MoS<sub>2</sub> with -CH<sub>3</sub> group as a function of vacuum thickness with 50 eV G<sub>0</sub>W<sub>0</sub> self-energy and 12×12 k-point sampling (2×2 supercell). (b) The QP band gaps of the functionalized 2H-MoS<sub>2</sub> with -CH<sub>3</sub> group as a function of k-point sampling with 50 eV G<sub>0</sub>W<sub>0</sub> self-energy and 8 Å vacuum thickness (2×2 supercell) . (c) Optical absorption spectra of the functionalized 2H-MoS<sub>2</sub> with -CH<sub>3</sub> group as a function of the number of valence and conduction bands with 50 eV self-energy and 8 Å vacuum thickness (2×2 supercell).

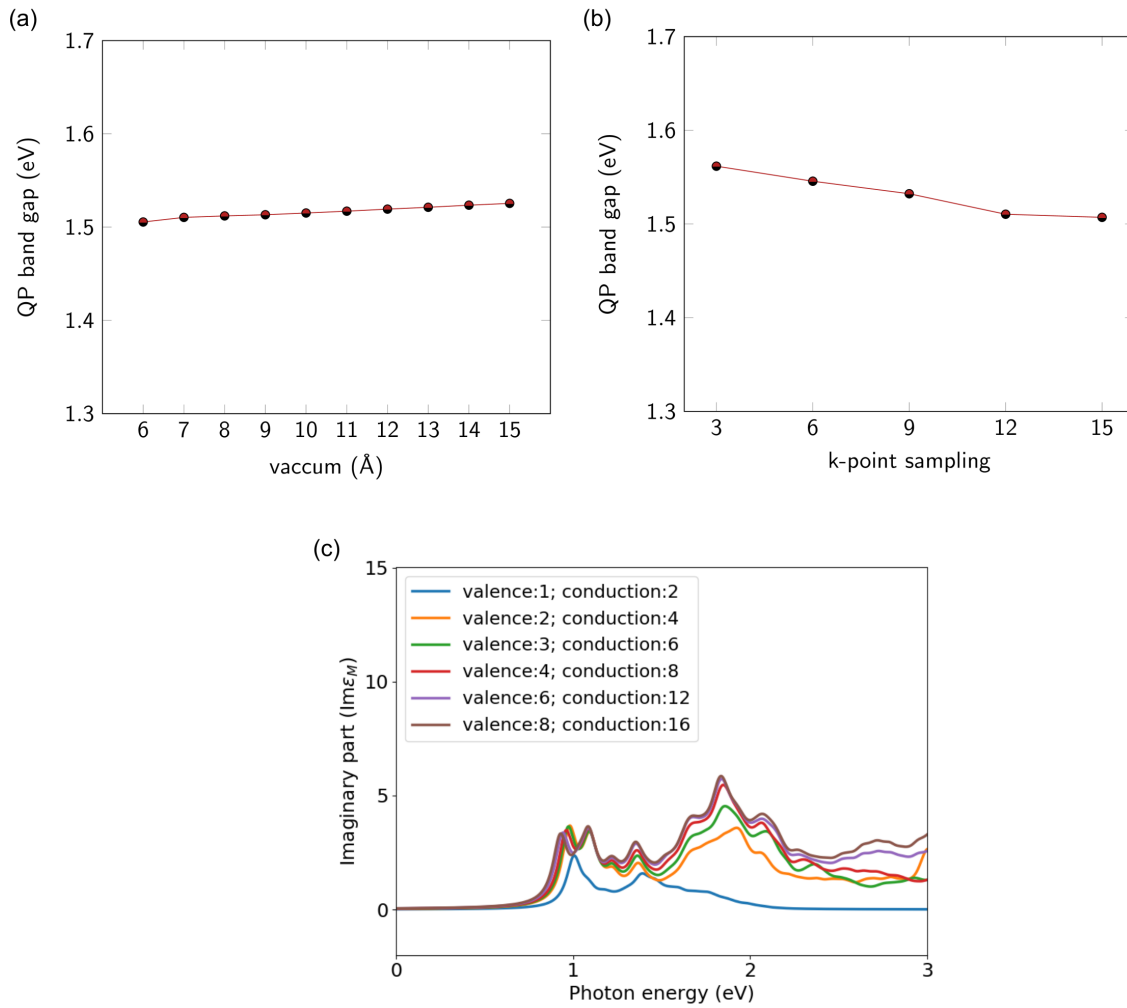

Fig. S2: Optimized structures of functionalized 2H-MoS<sub>2</sub> and 1T'-MoS<sub>2</sub> with various groups.

(a) -F

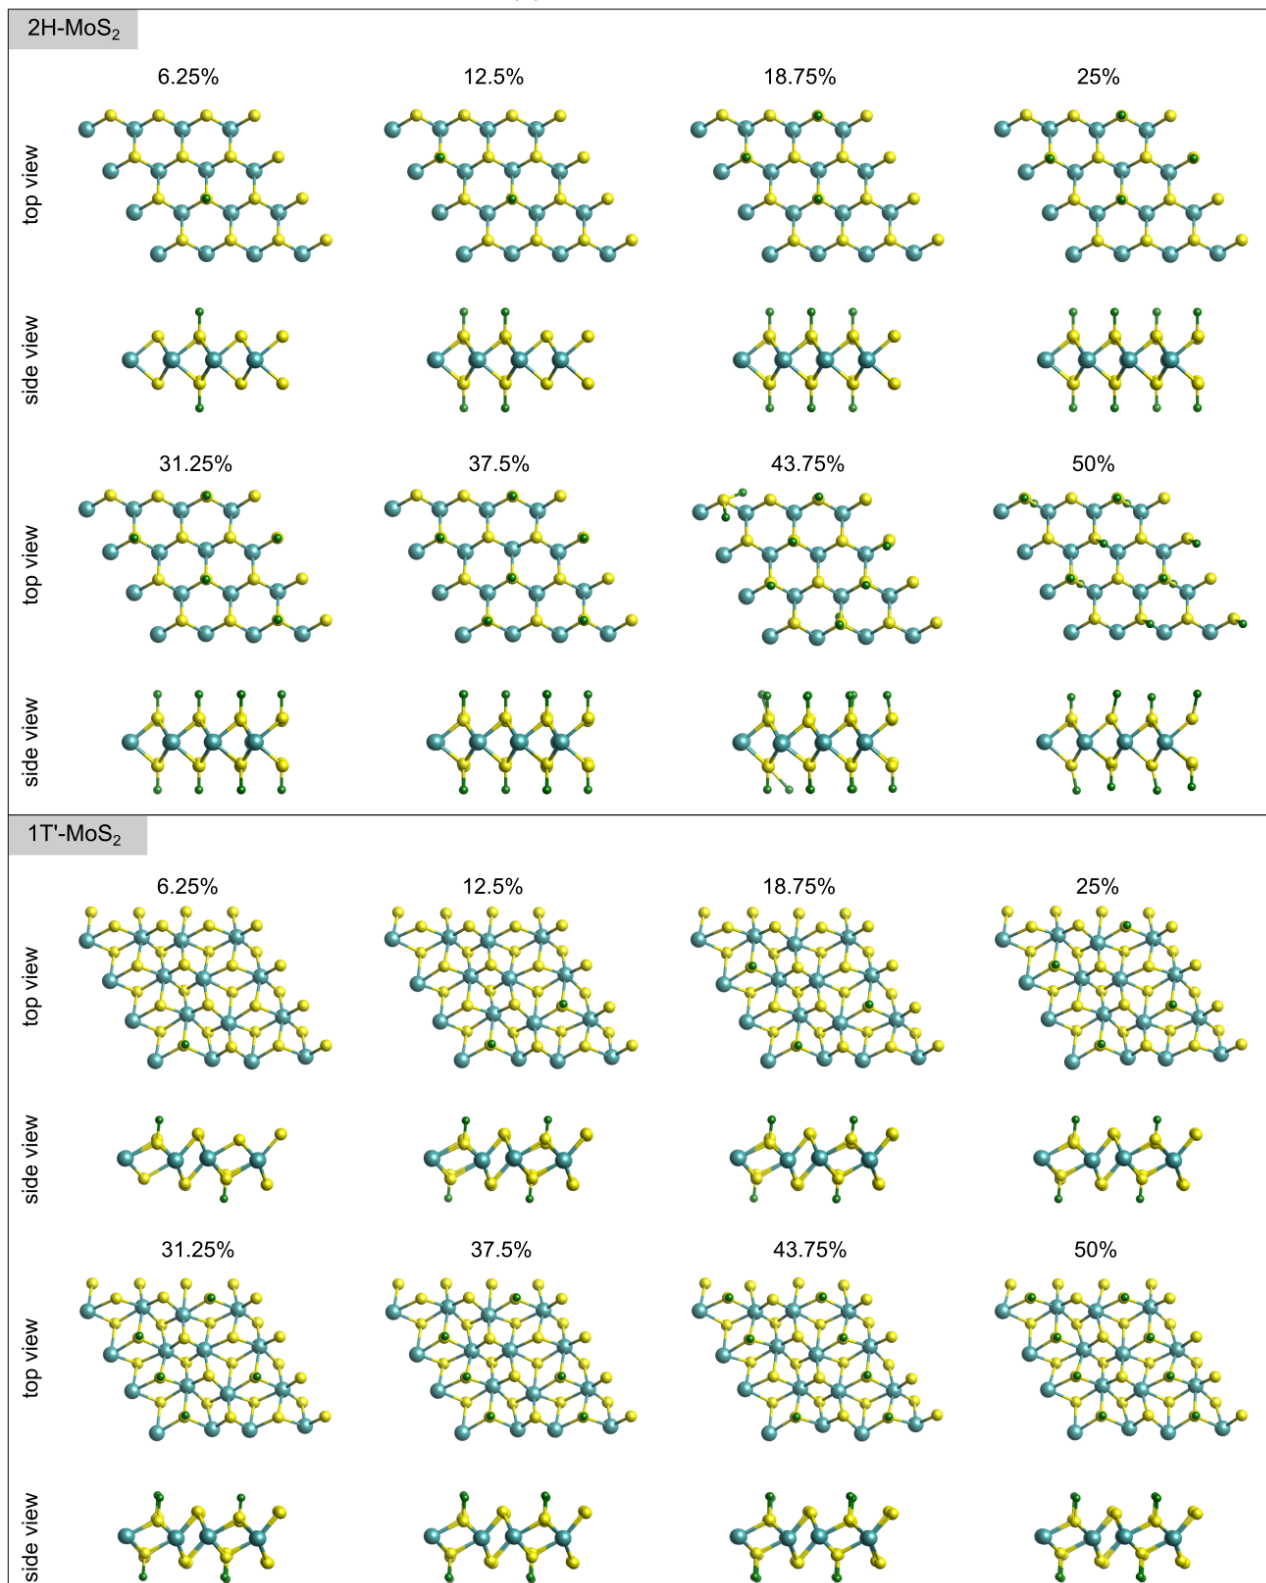

(b) -NH<sub>2</sub>

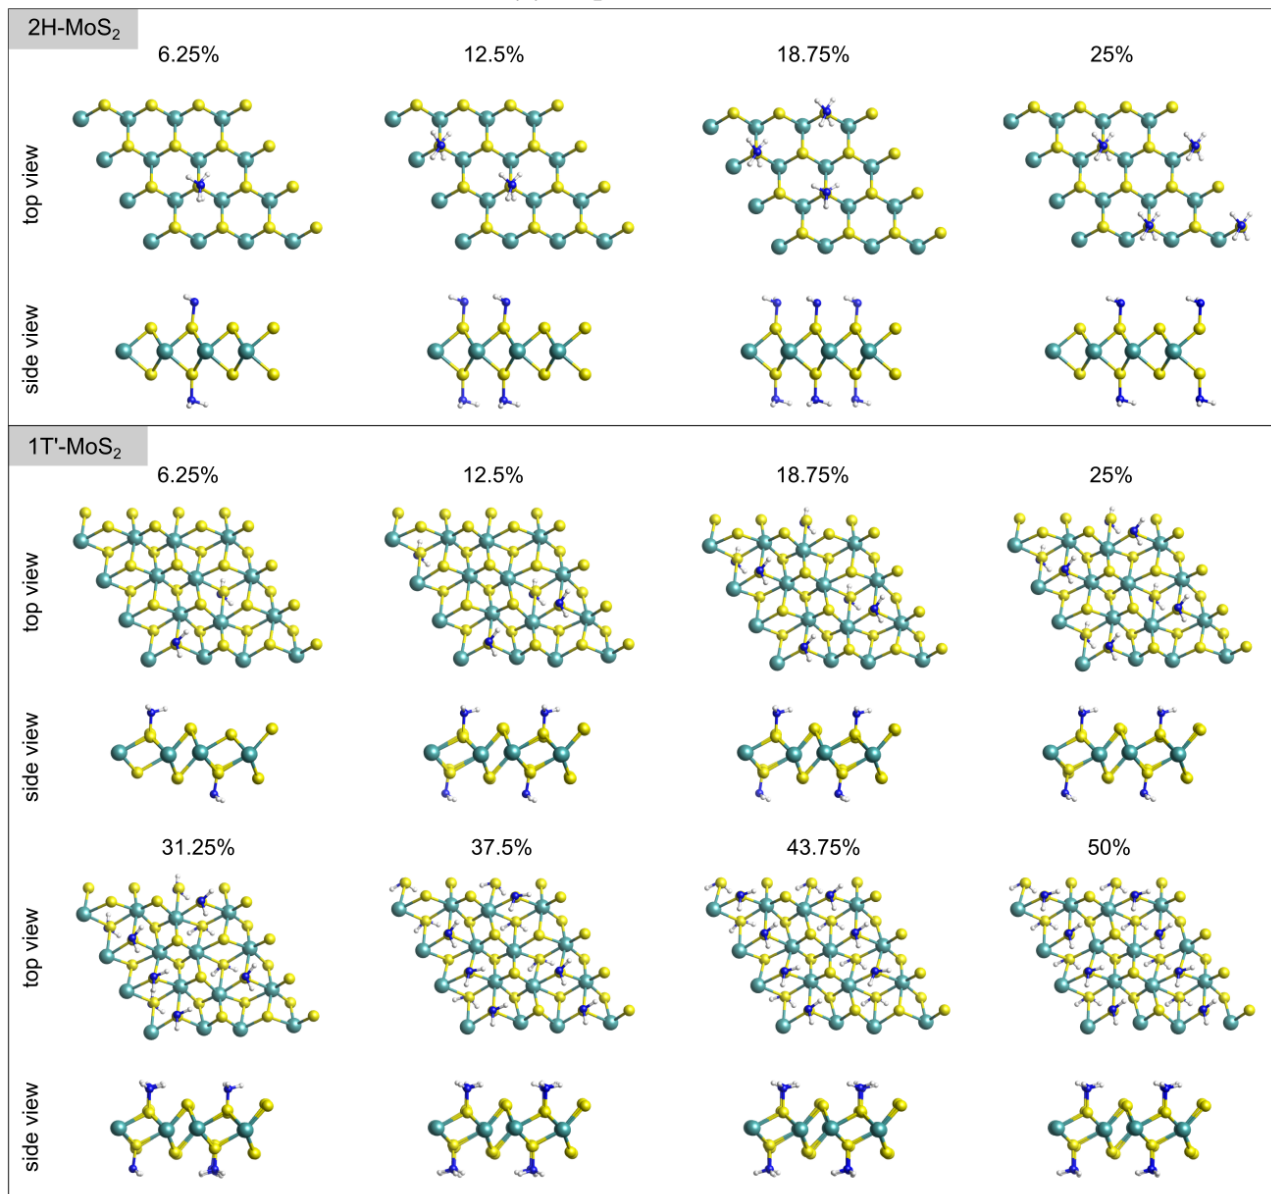

(c) -CH<sub>3</sub>

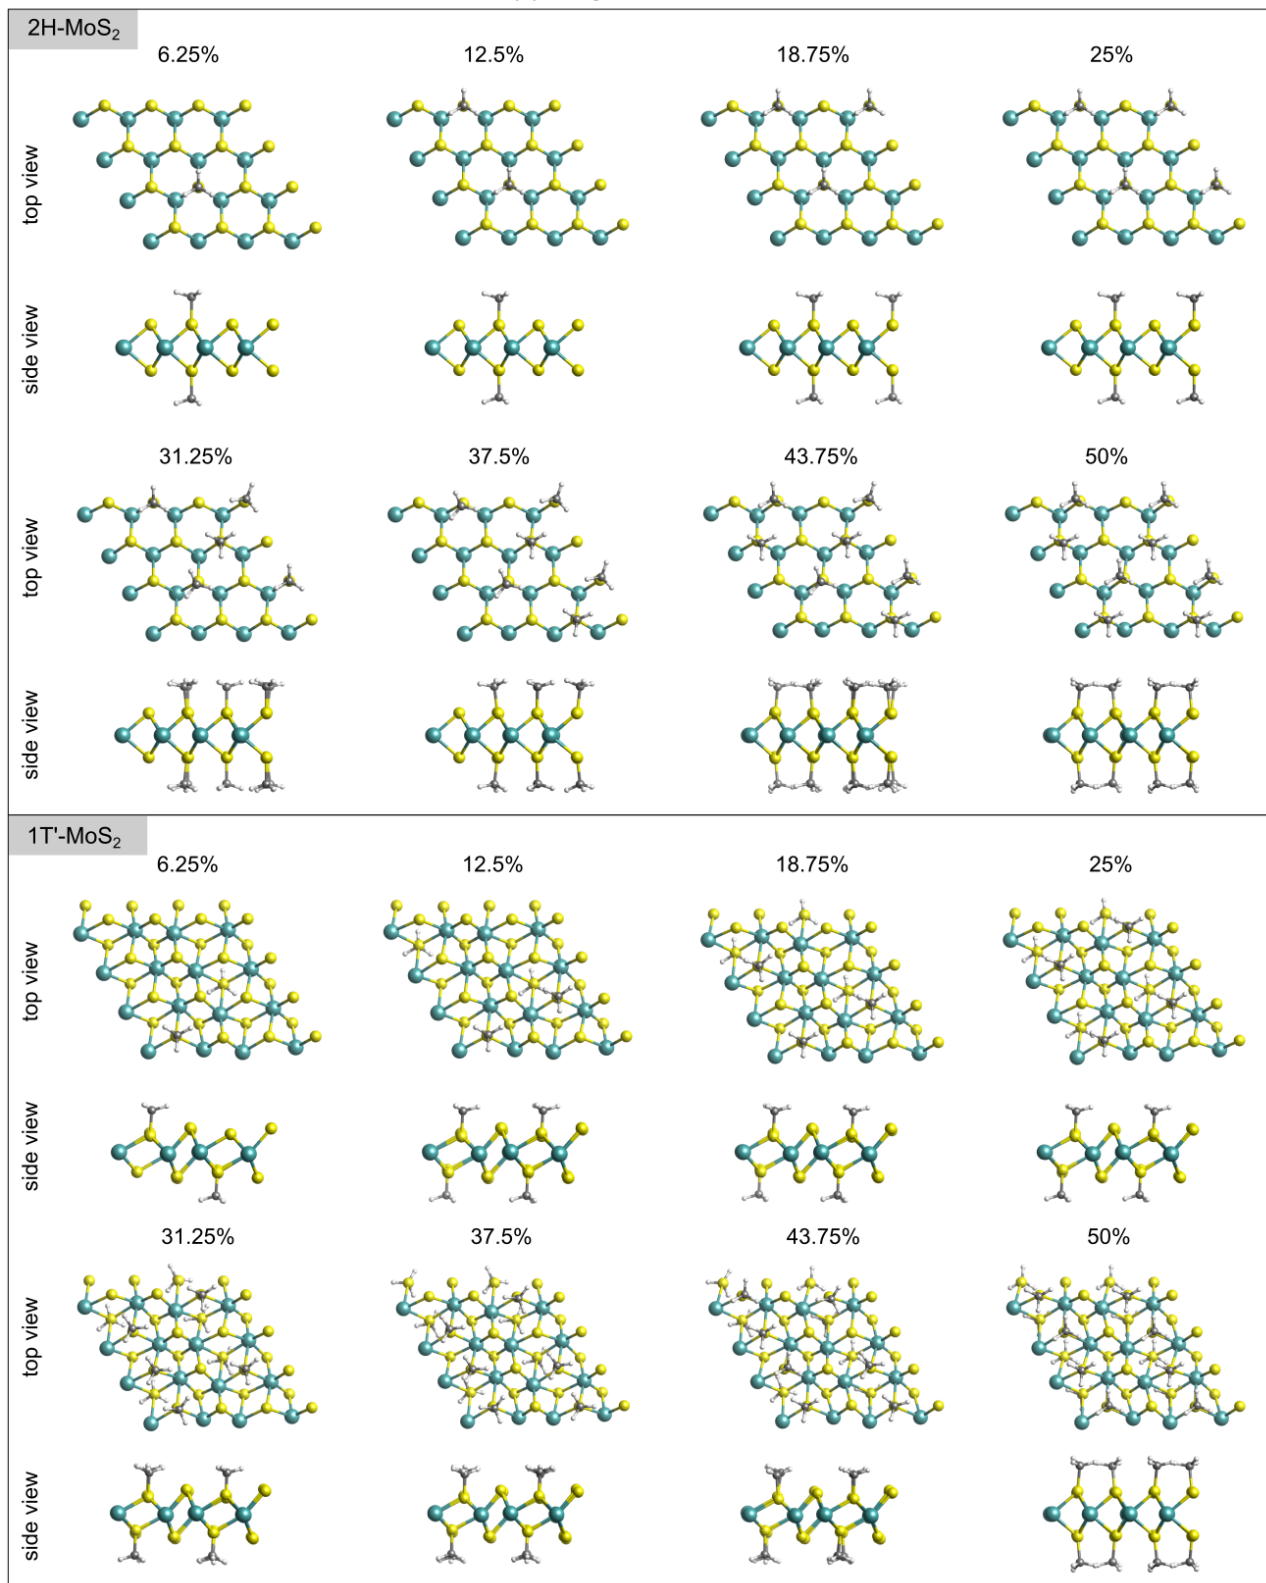

(d) -CH<sub>2</sub>CH<sub>2</sub>CN

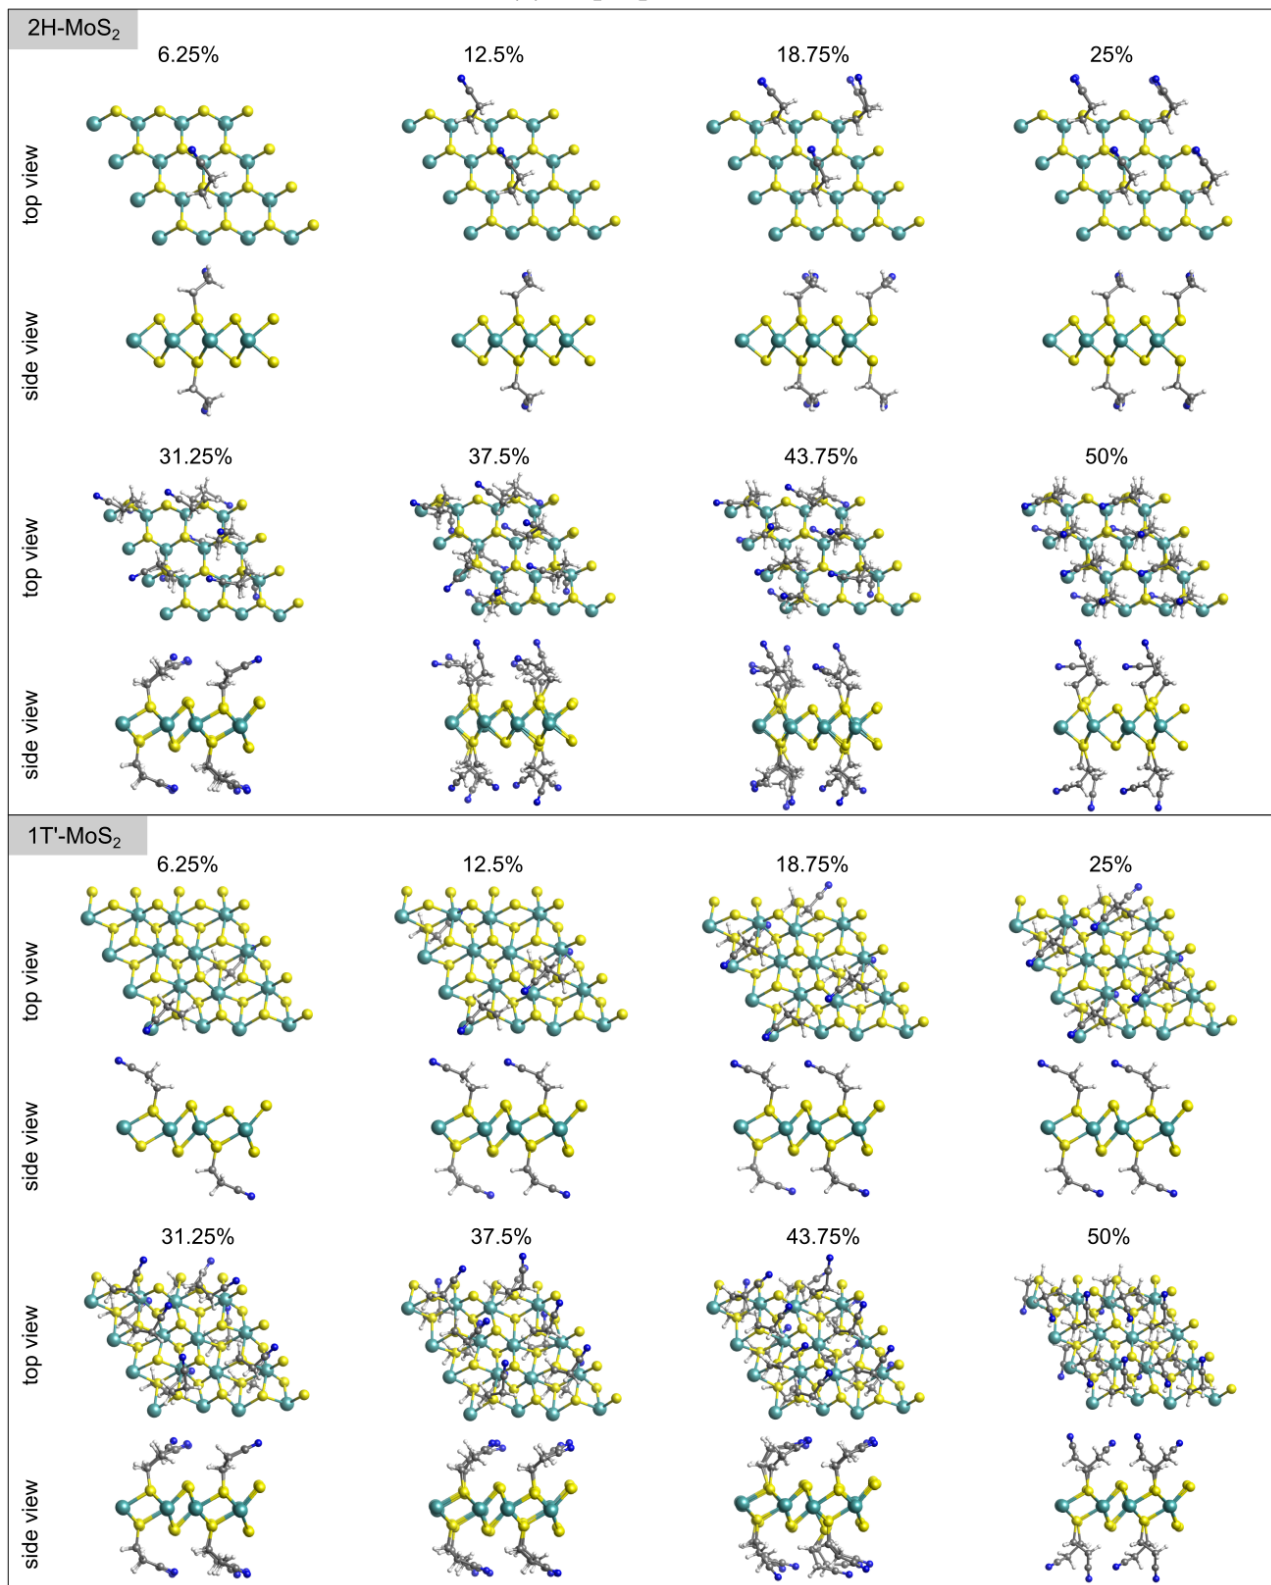

(e) -CH<sub>2</sub>CH<sub>2</sub>OH

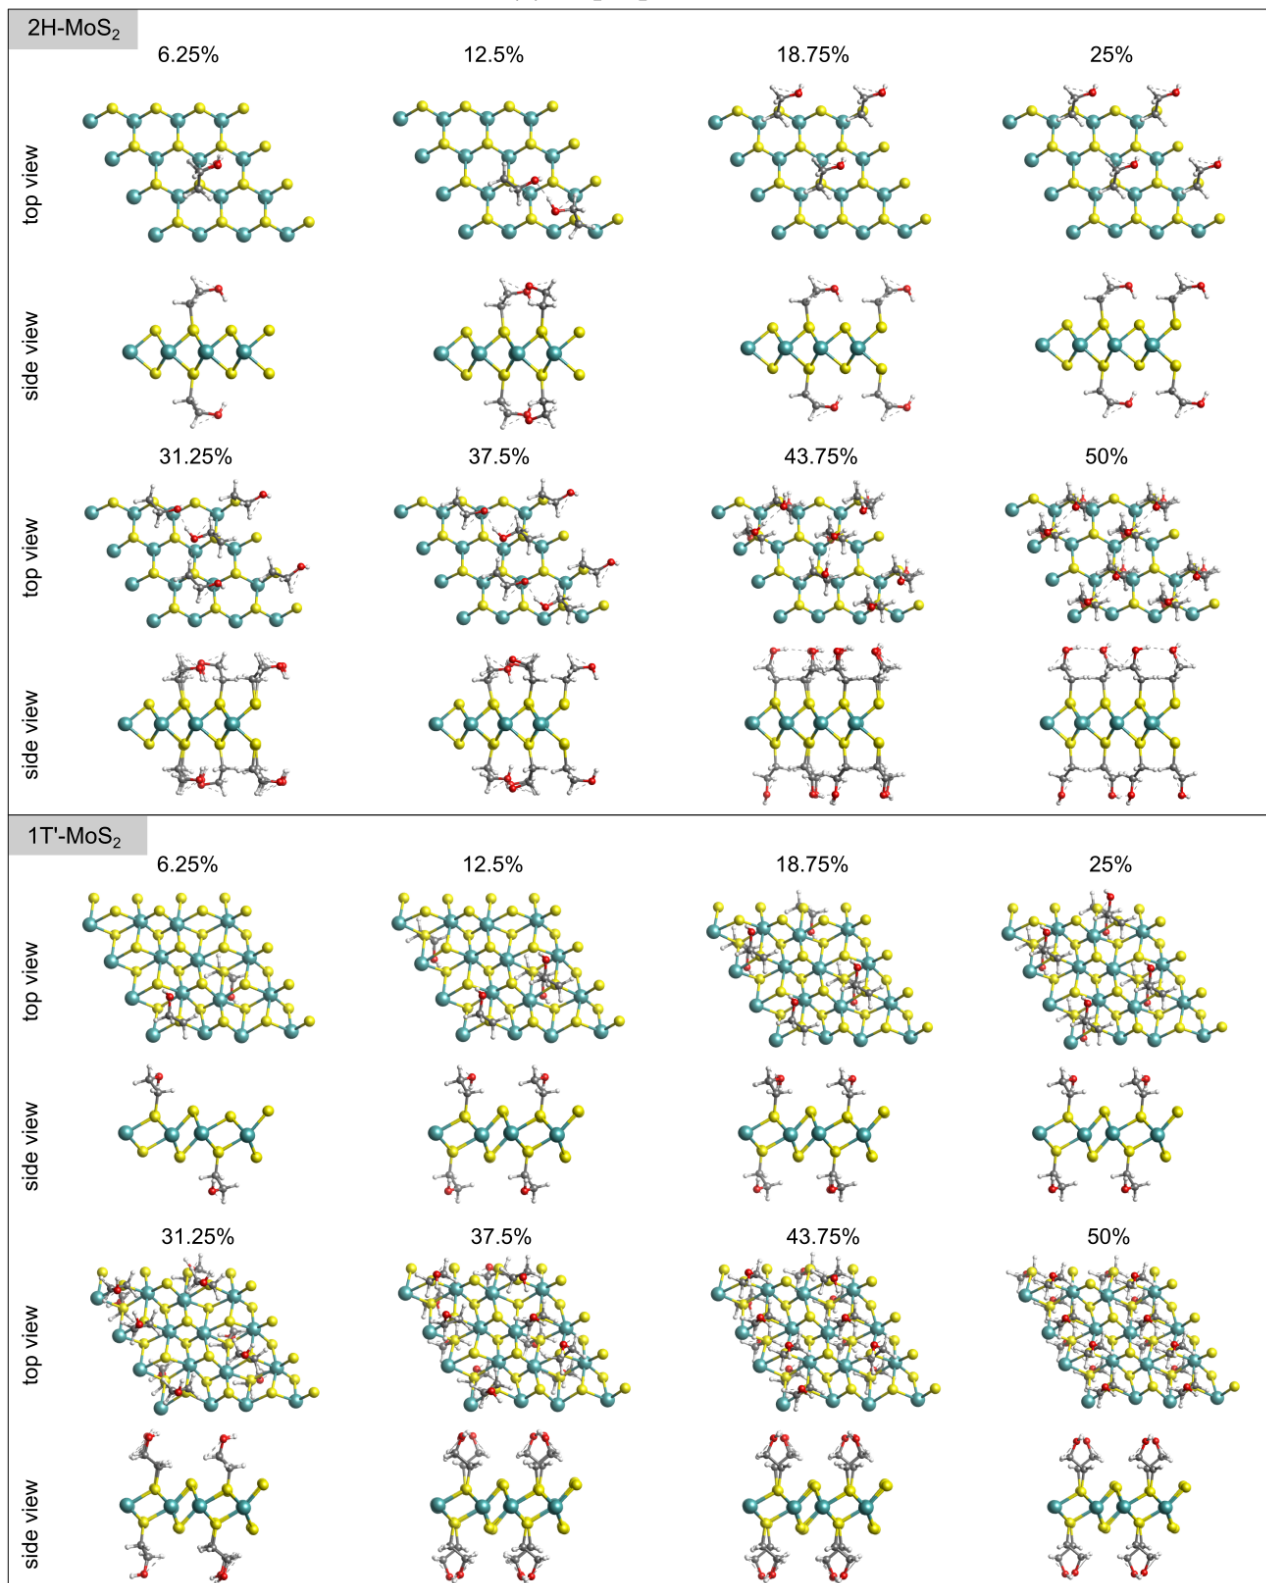

(f) -Ph

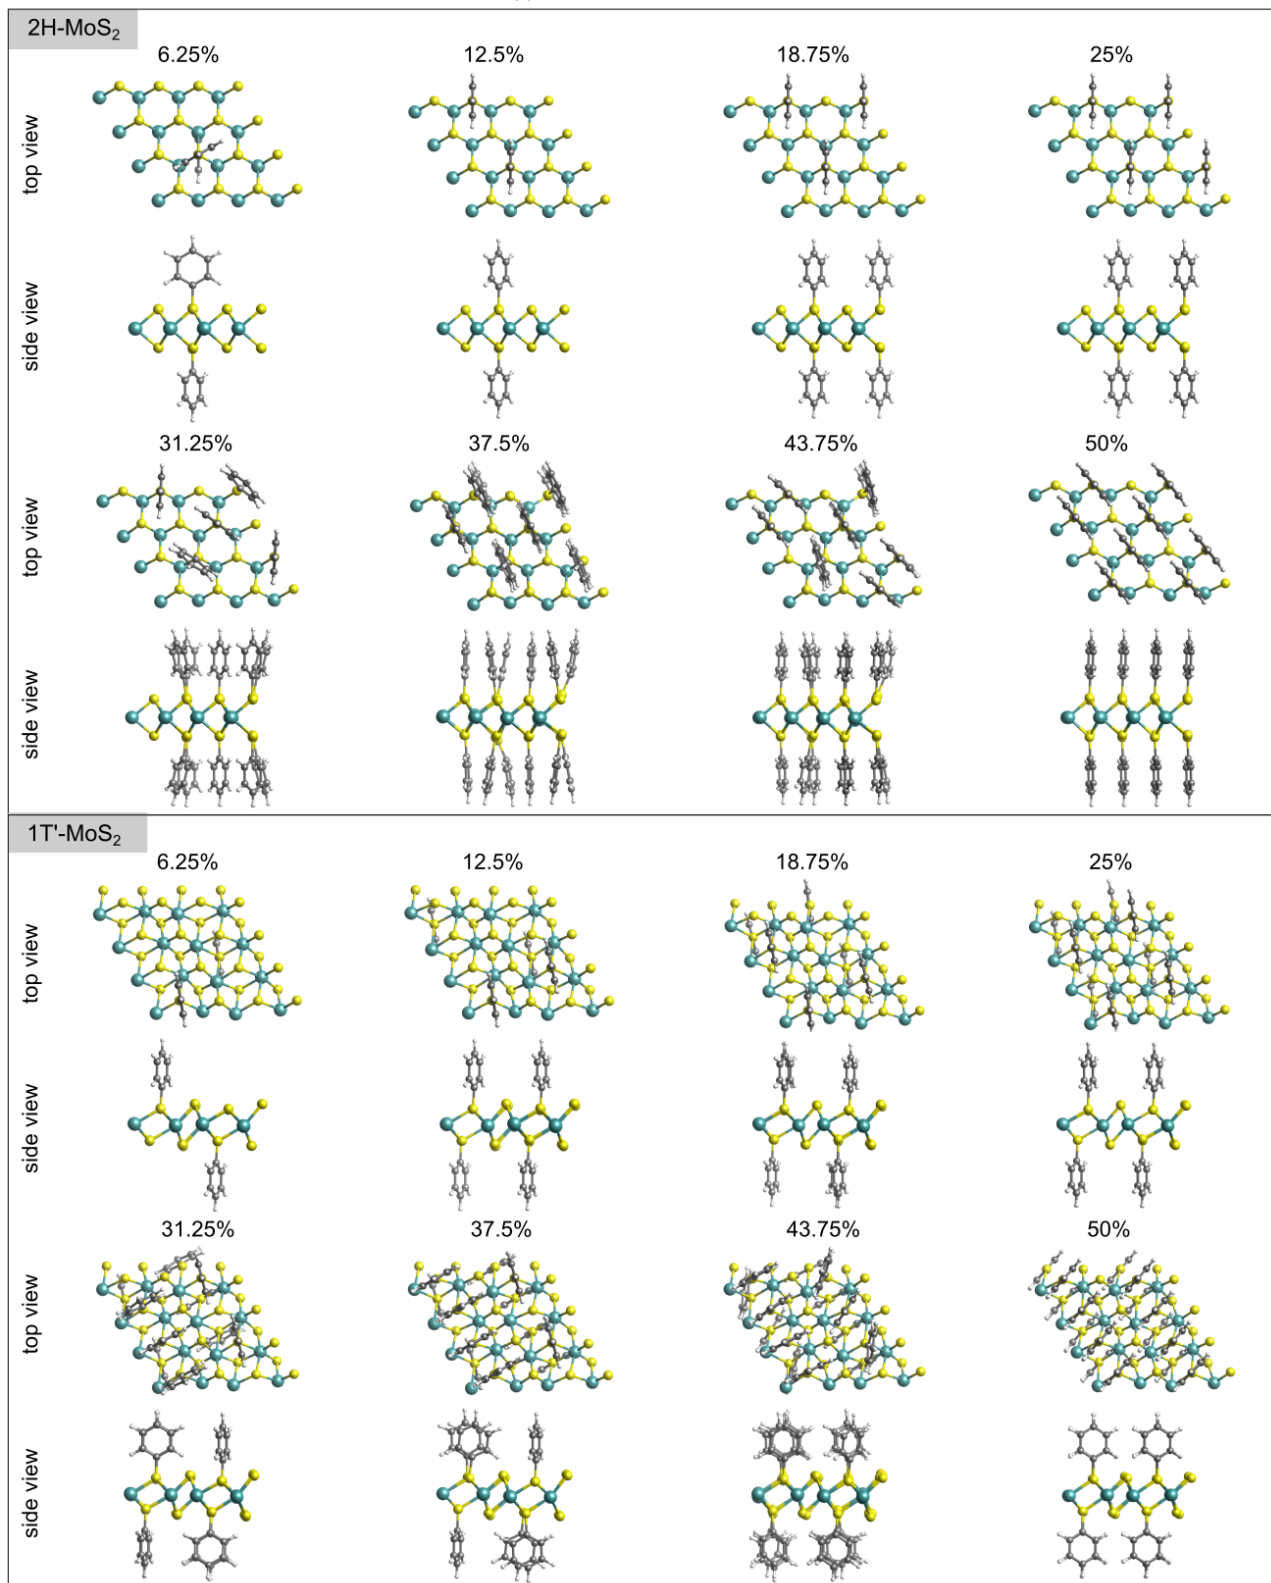



(g) -PhNO<sub>2</sub>

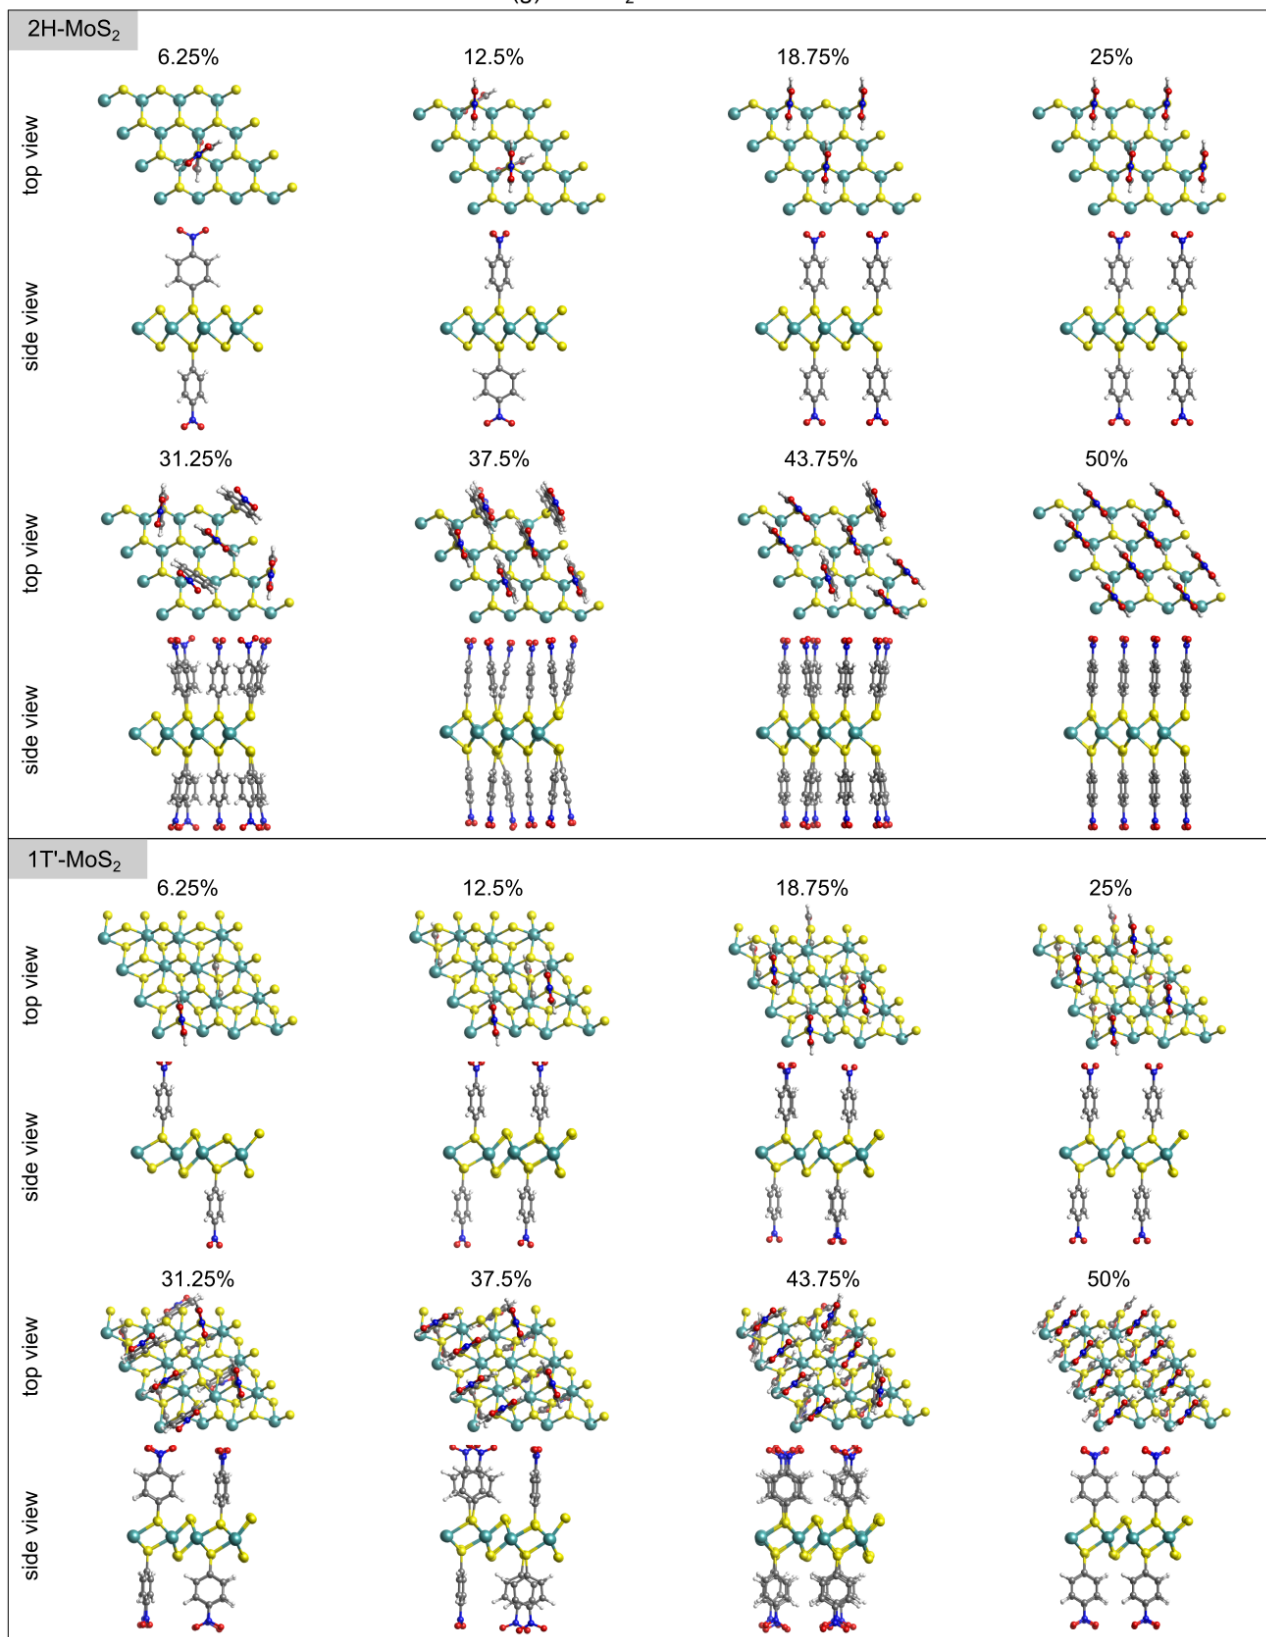

(h) -PhOH

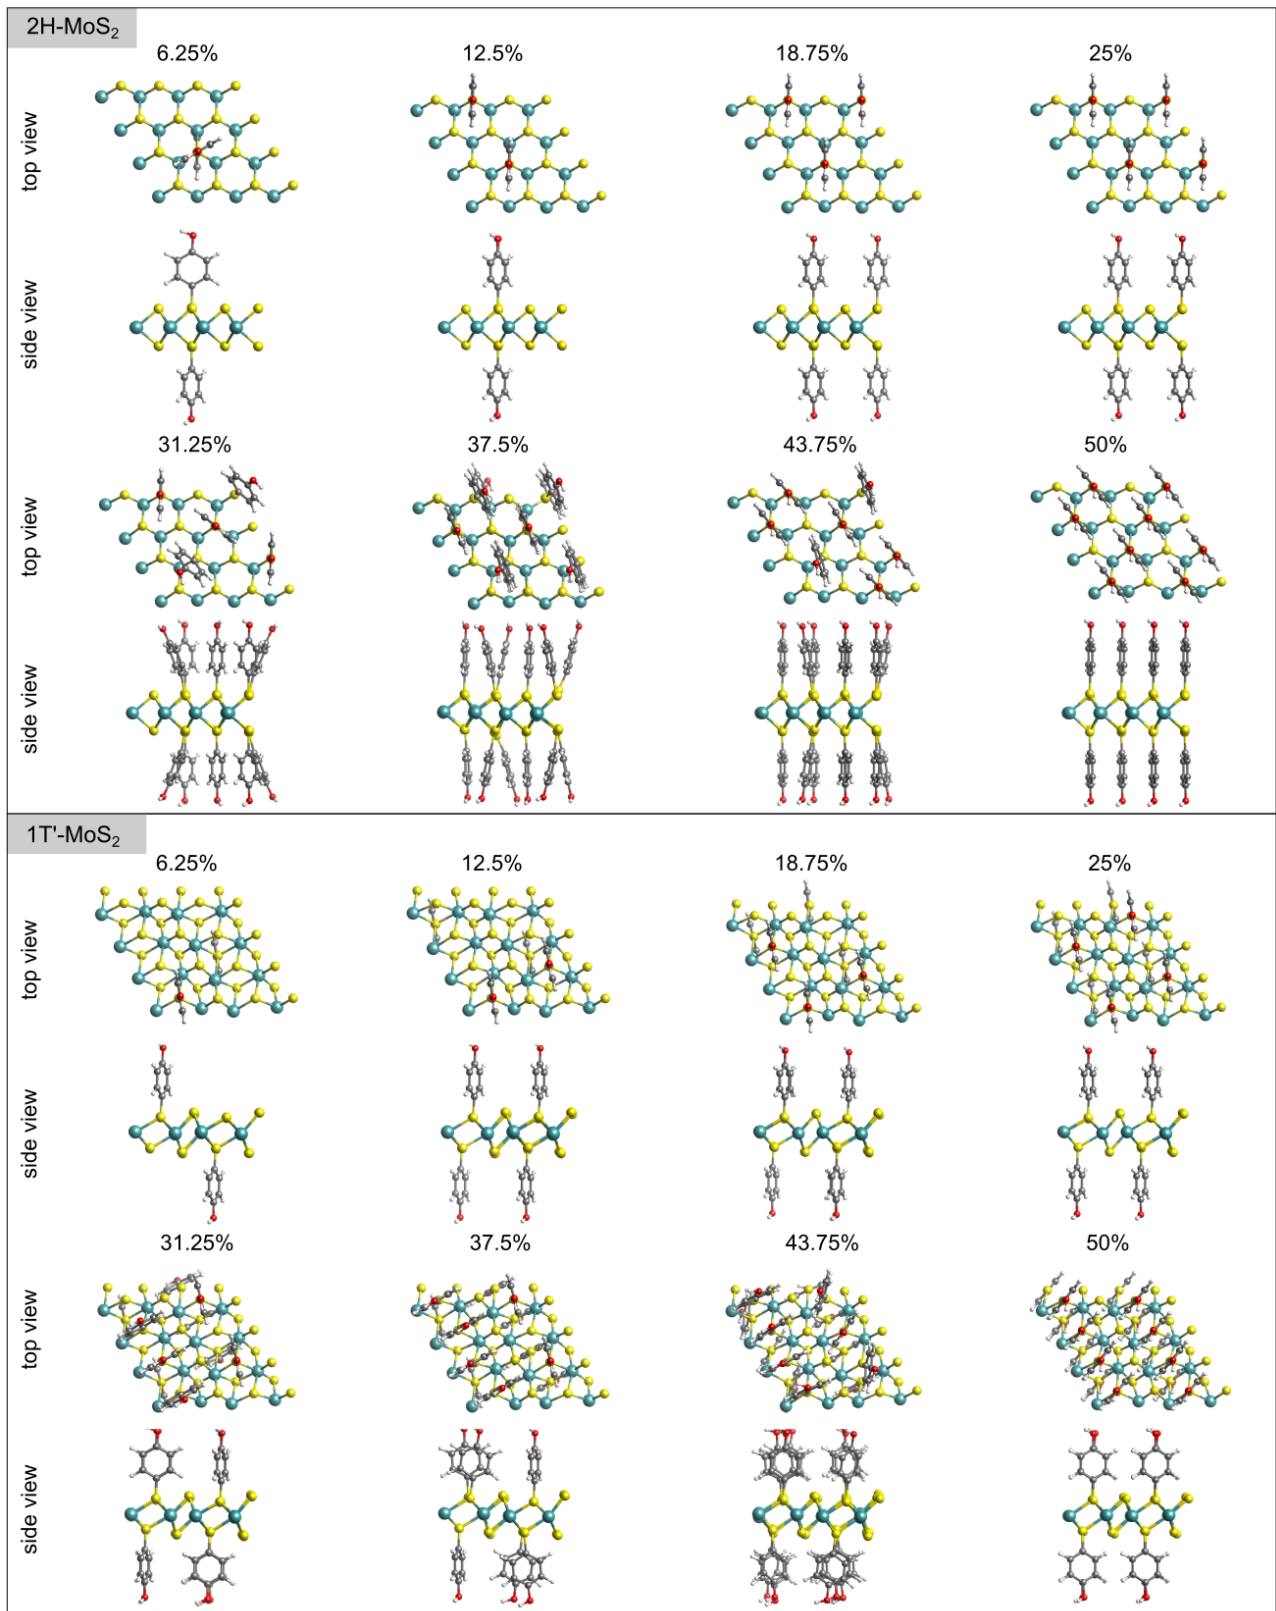

(i) m-F-CH<sub>3</sub>

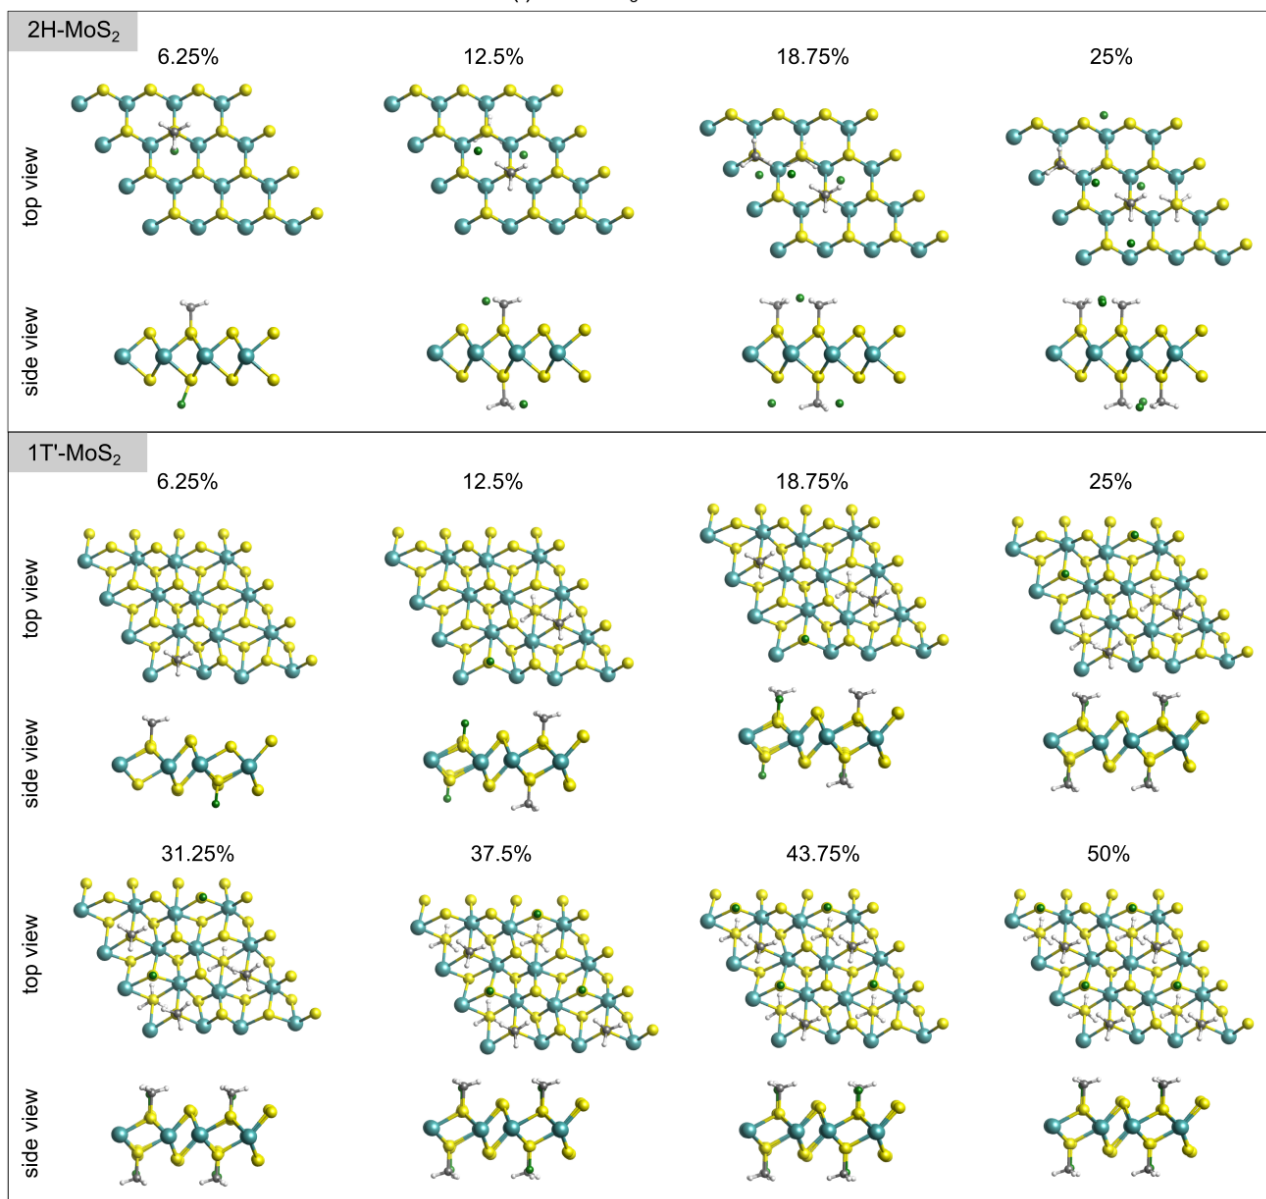

(j) m-NH<sub>2</sub>-CH<sub>3</sub>

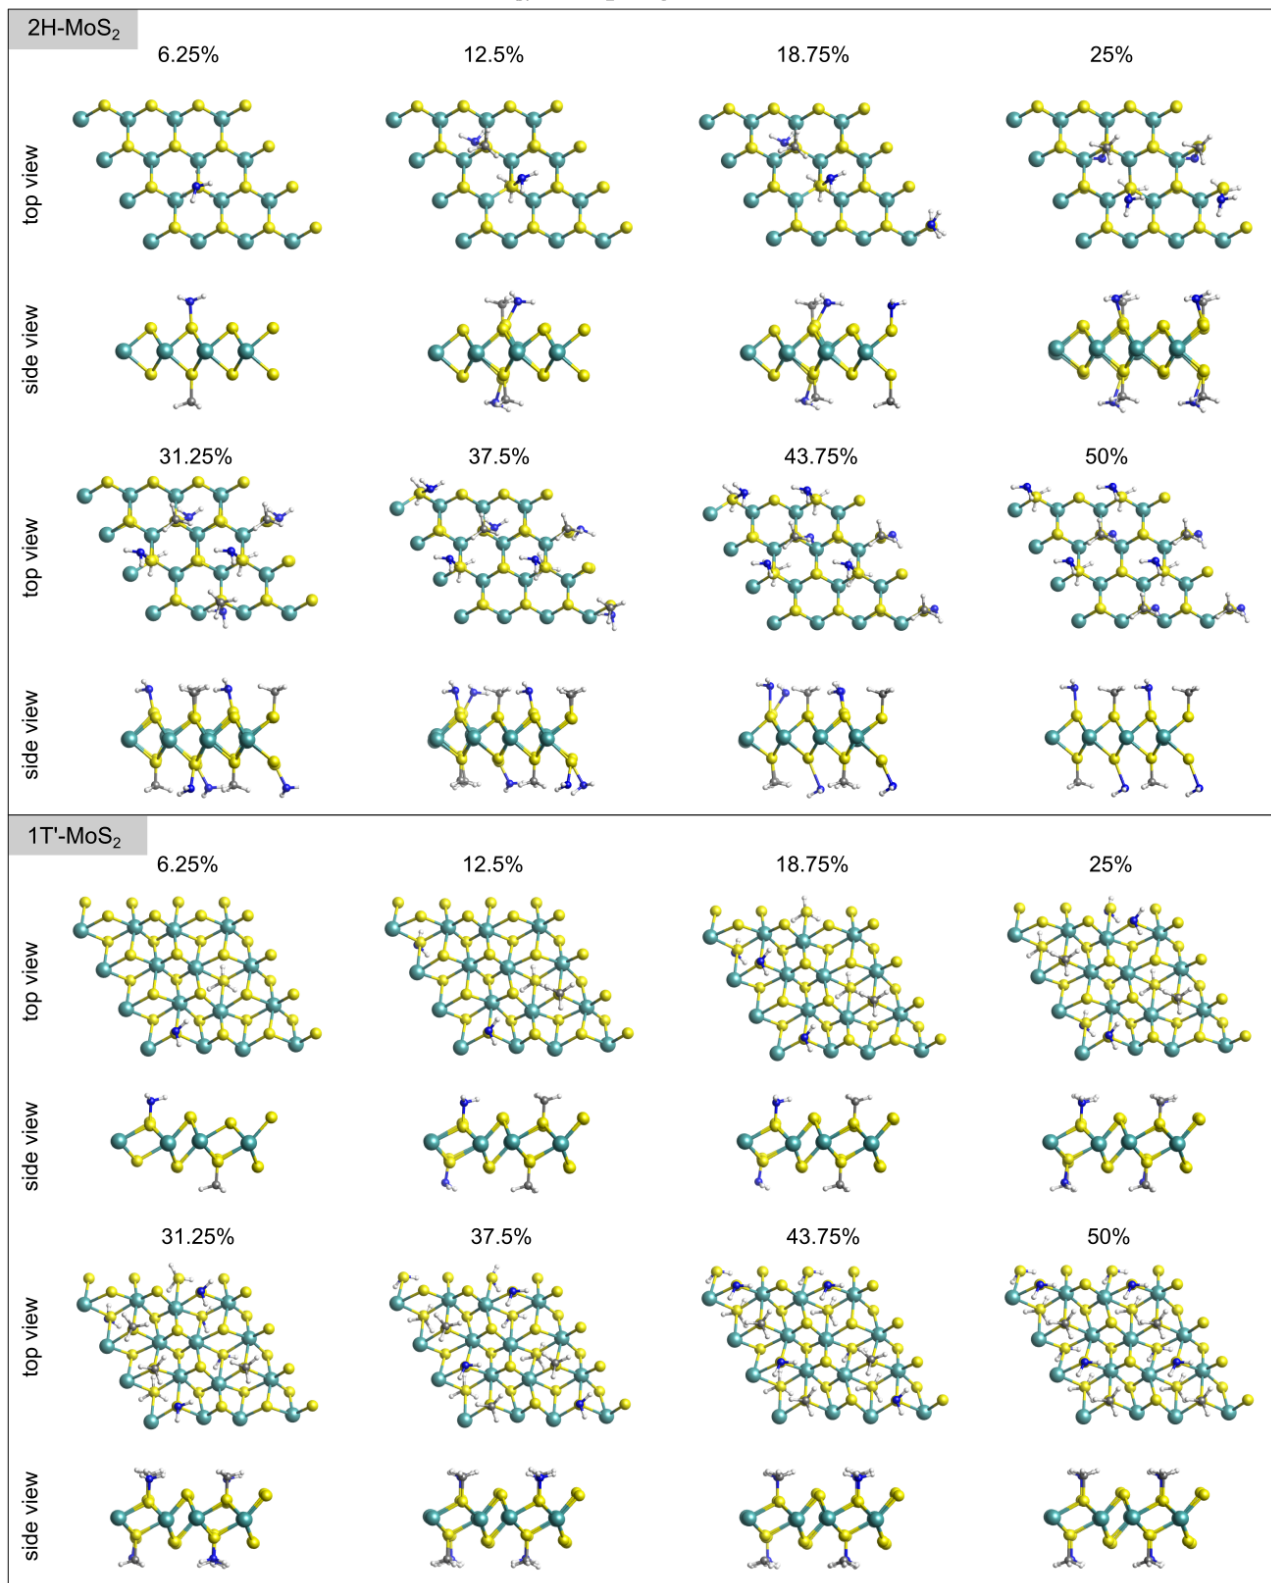

(k) m-CH<sub>3</sub>-Ph

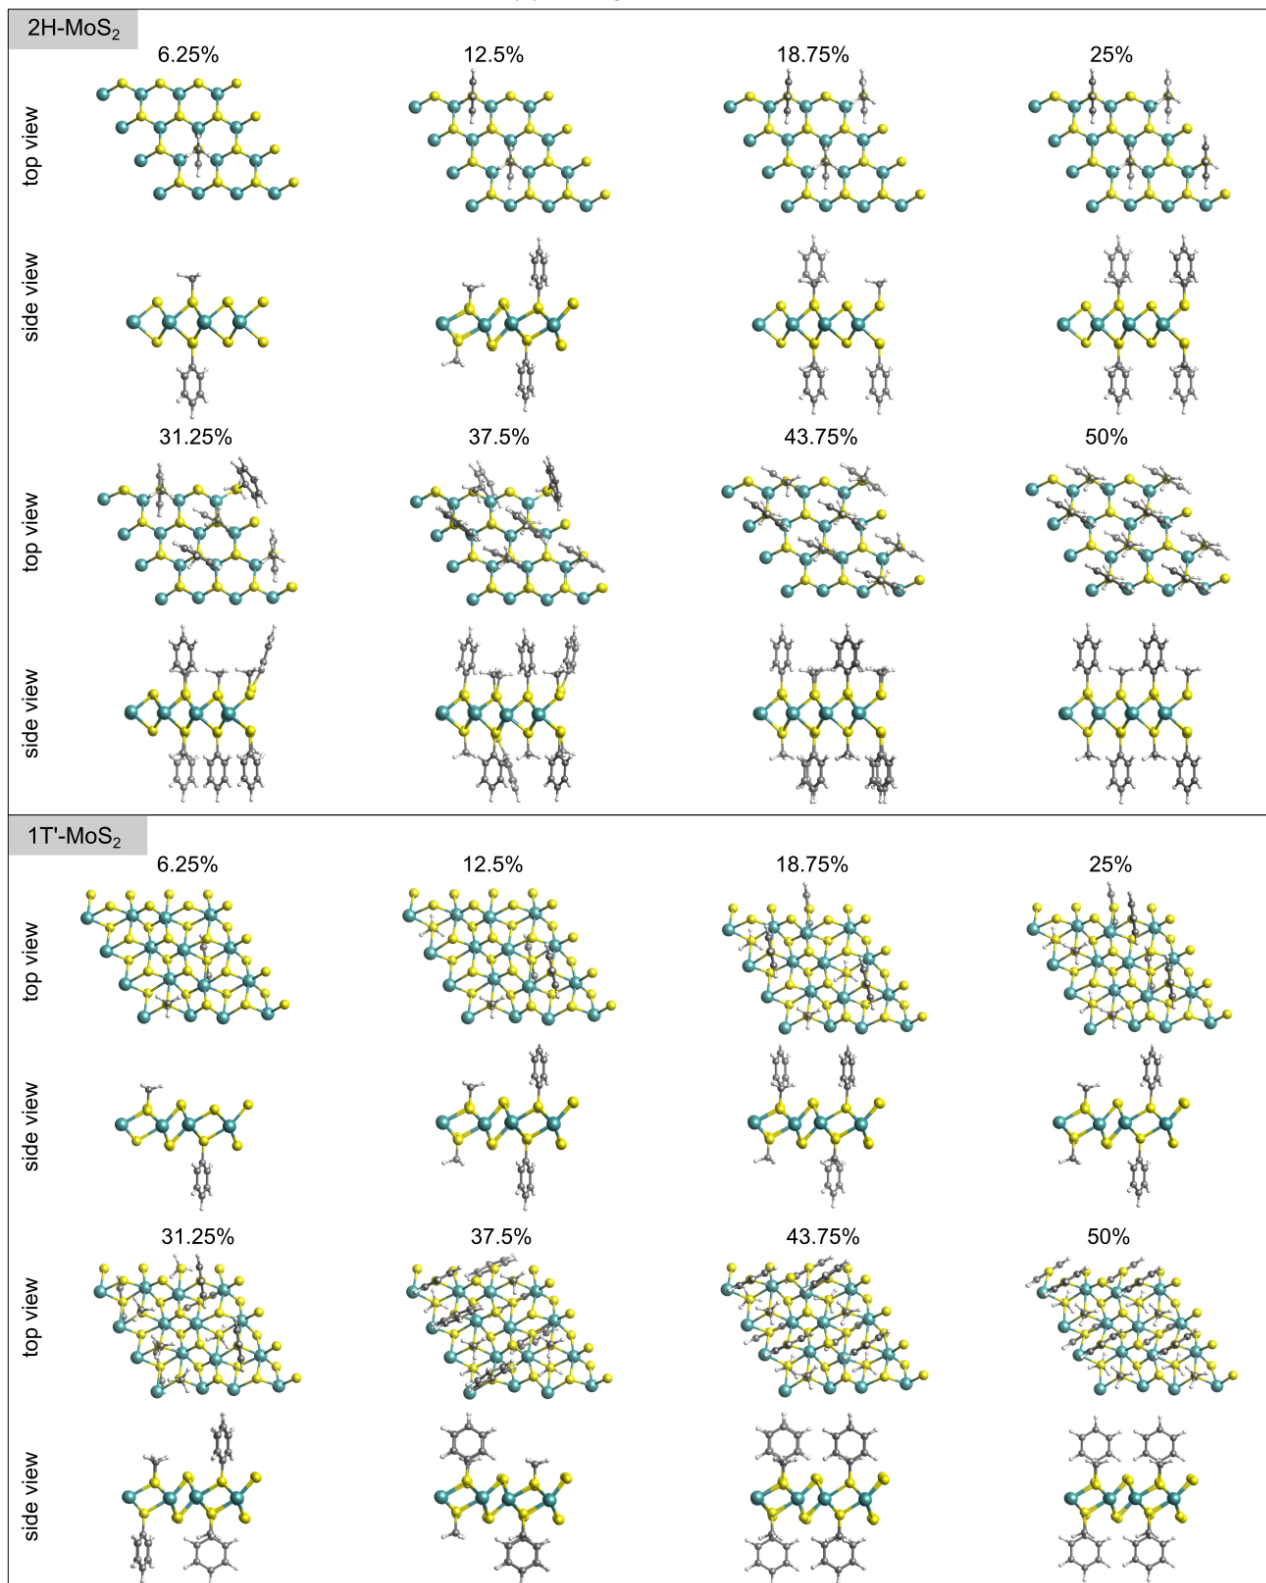

(I) s-F-CH<sub>3</sub>

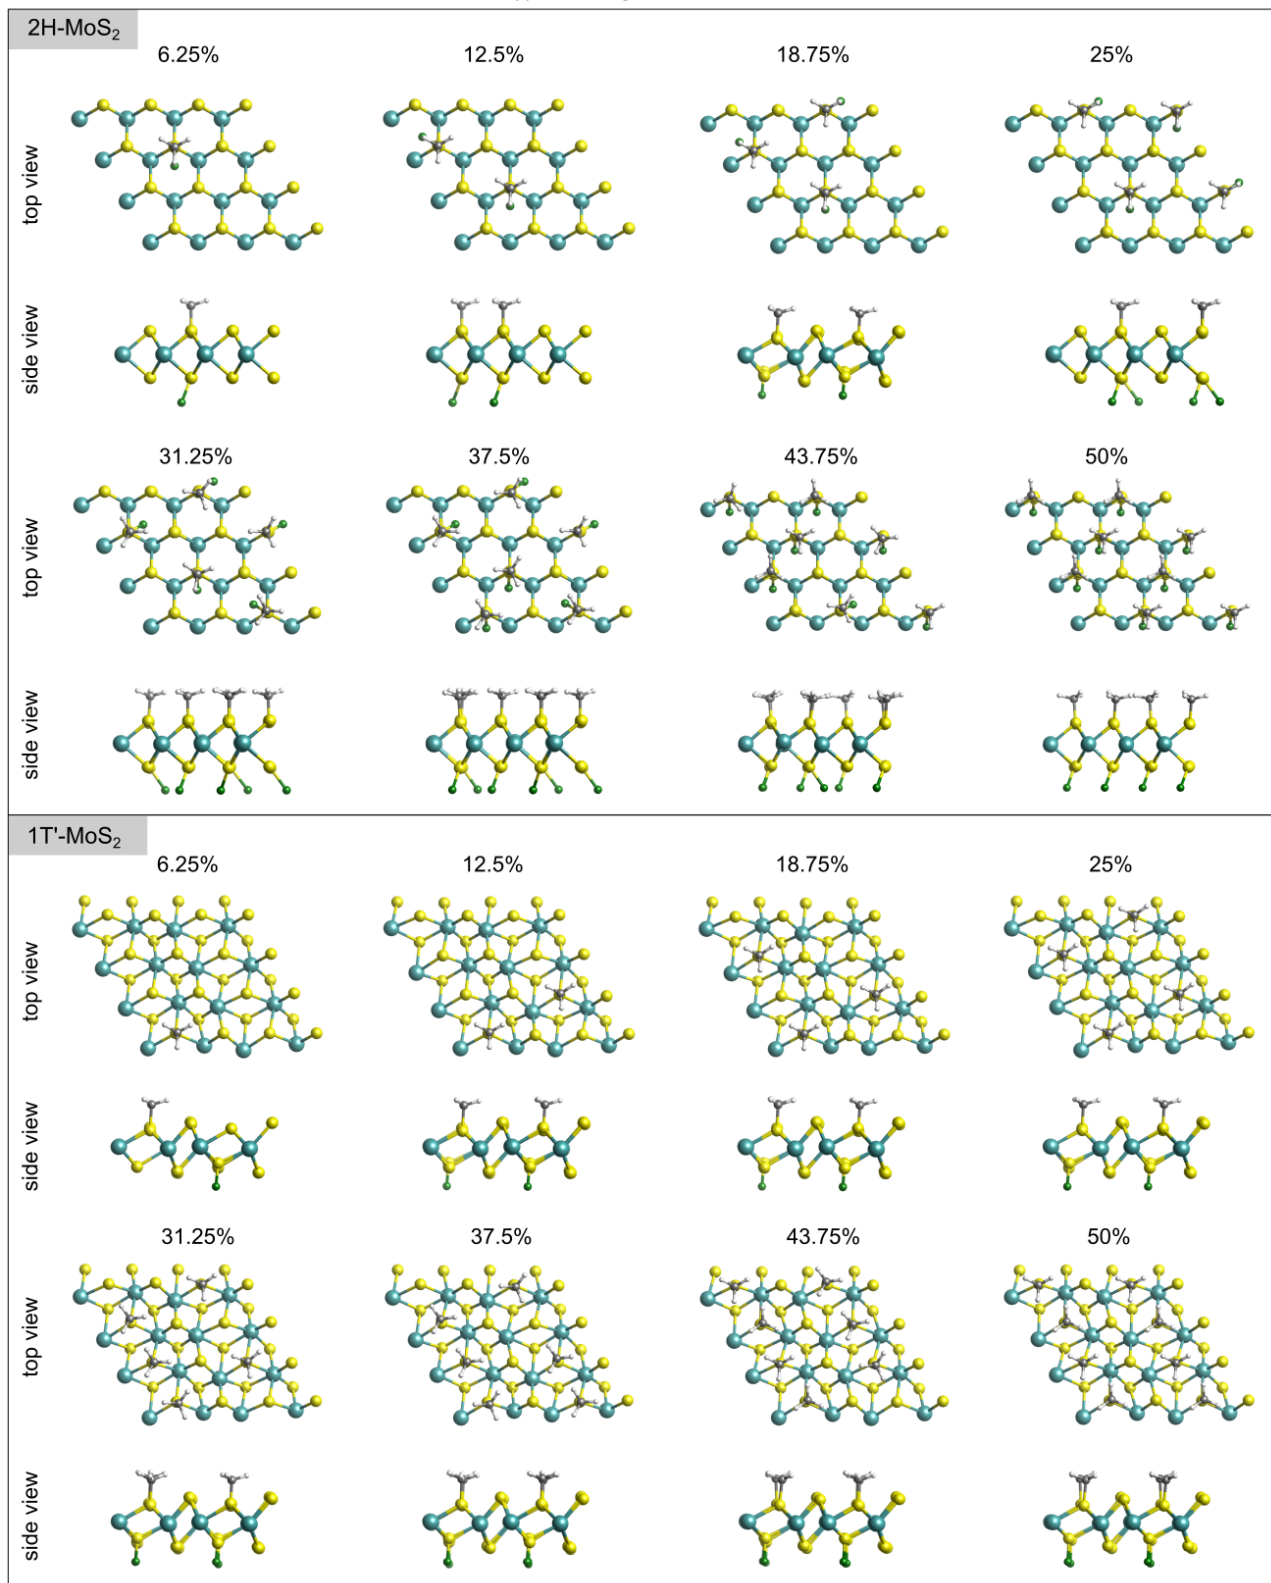

(m) s-NH<sub>2</sub>-CH<sub>3</sub>

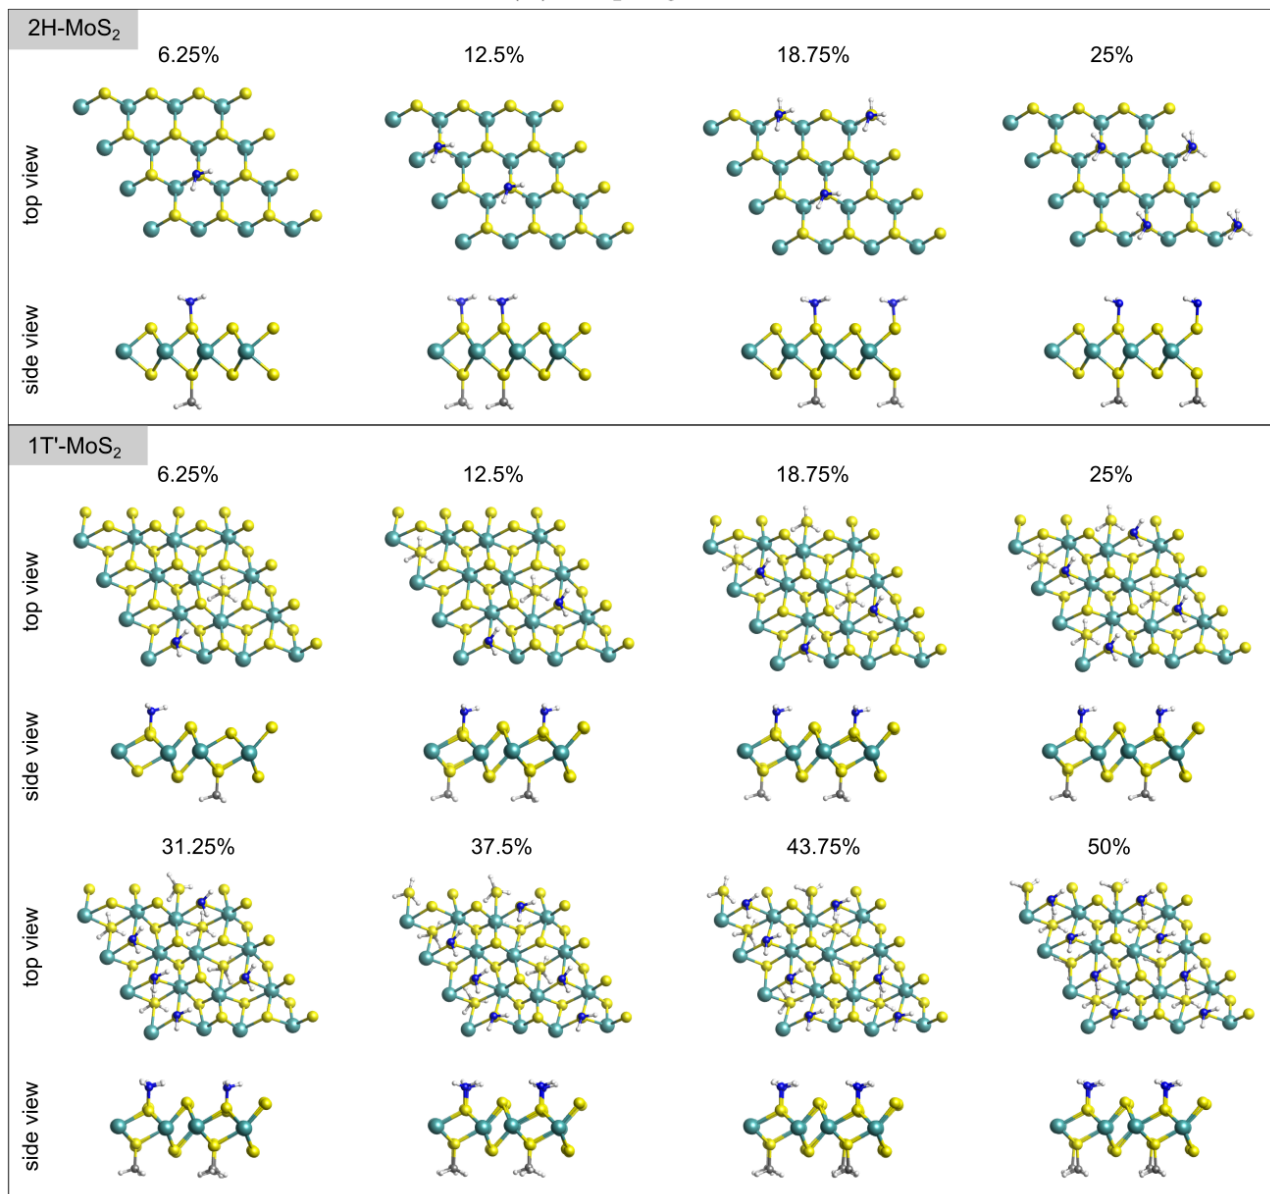

(n) s-CH<sub>3</sub>-Ph

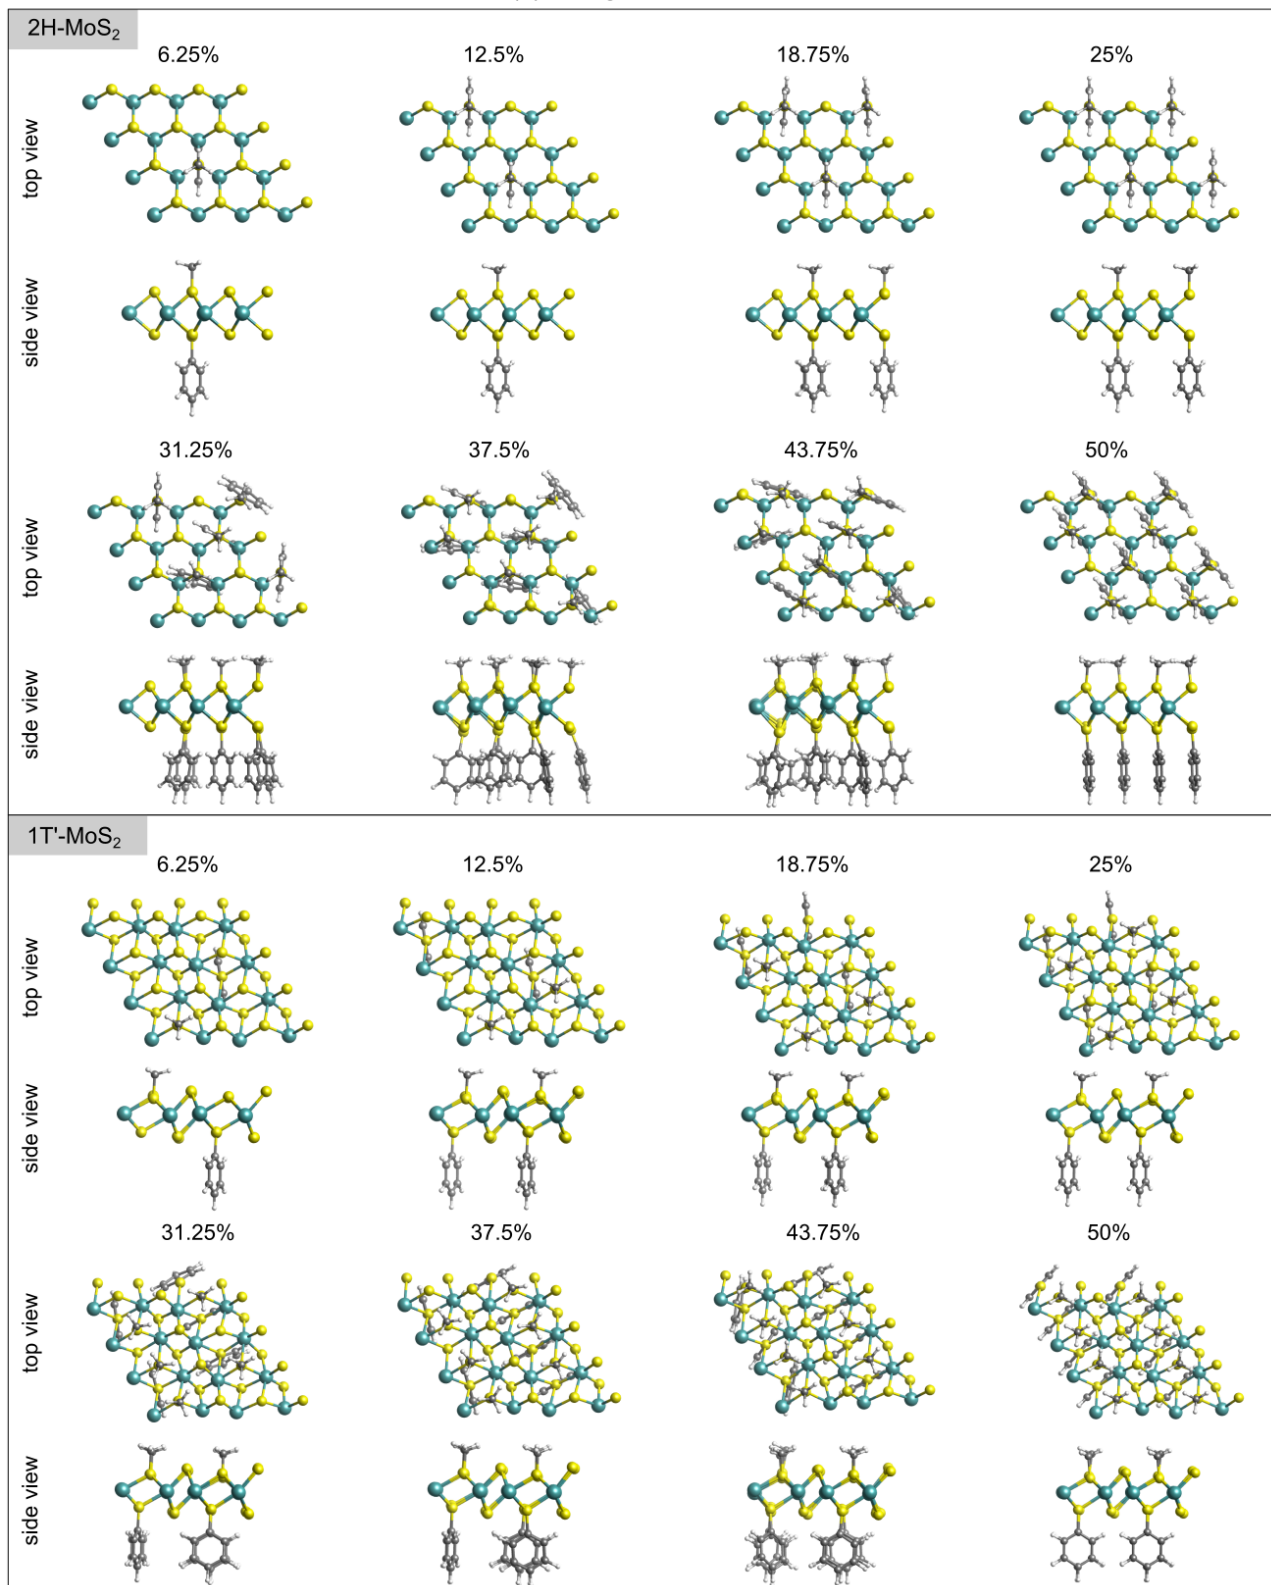



Fig. S3: Average energy difference  $\Delta E$  between functionalized 2H- and 1T'-MoS<sub>2</sub> as a function of the group coverage. Here  $\Delta E = (E_{1T'} - E_{2H})/m$ , where  $m$  is the number of MoS<sub>2</sub> units,  $E_{1T'}$  and  $E_{2H}$  are the total energy of functionalized 2H- and 1T'-MoS<sub>2</sub> for a given coverage, respectively. The positive  $\Delta E$  indicates that functionalized 2H-MoS<sub>2</sub> is more stable, while the negative  $\Delta E$  indicates that functionalized 1T'-MoS<sub>2</sub> is more stable.

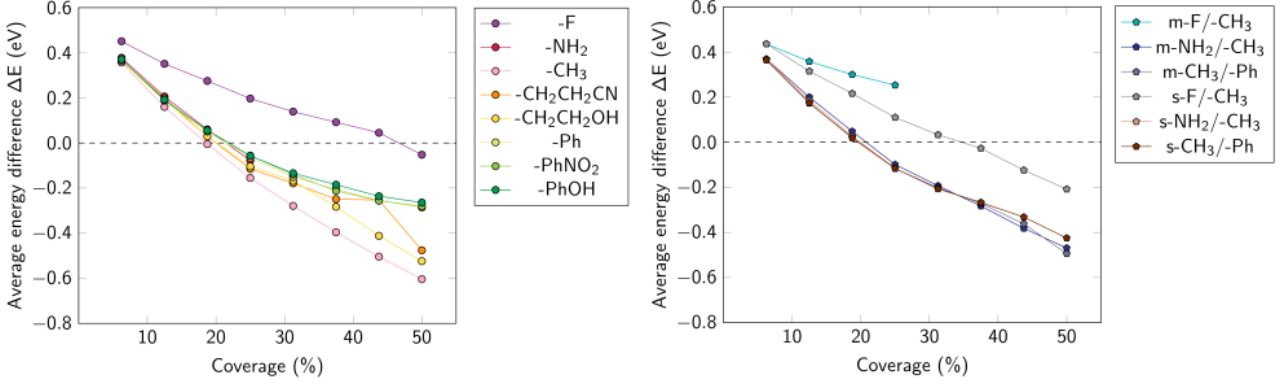

Fig. S4: Average Bader charge transfer  $\Delta Q$  as a function of the group coverage with respect to the 2H- and 1T'-MoS<sub>2</sub> monolayers. Here  $\Delta Q = \sum_i^N (Z_i - Q_i^{Bader})/n$ , where  $N$  is the total number of atoms in the attached groups,  $Z_i$  is the number of electrons of atom  $i$ ,  $Q_i^{Bader}$  is the Bader charge of atom  $i$  and  $n$  is the number of functional groups. A positive charge transfer value indicates electron flow from the substrate to the functional group.

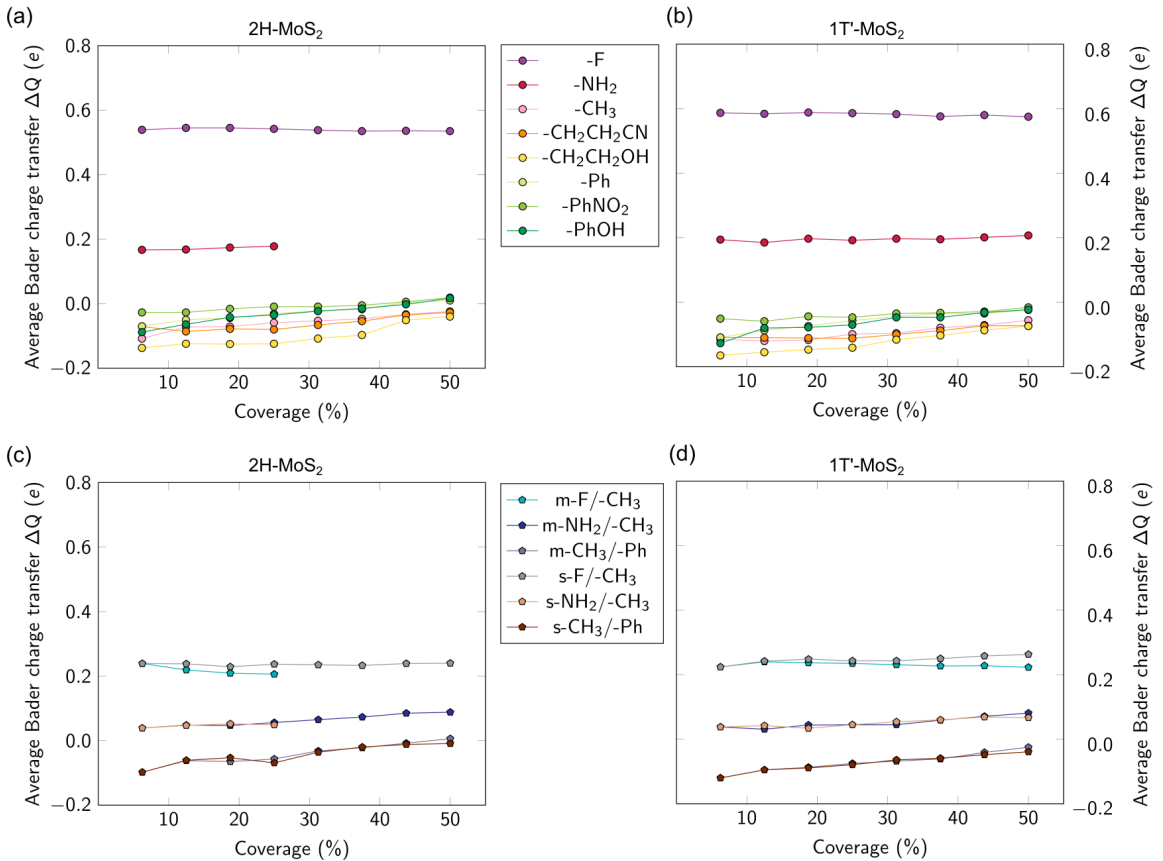

Fig. S5: DFT band gaps as a function of the group coverage with respect to the functionalized 2H-MoS<sub>2</sub> and 1T'-MoS<sub>2</sub> monolayers.

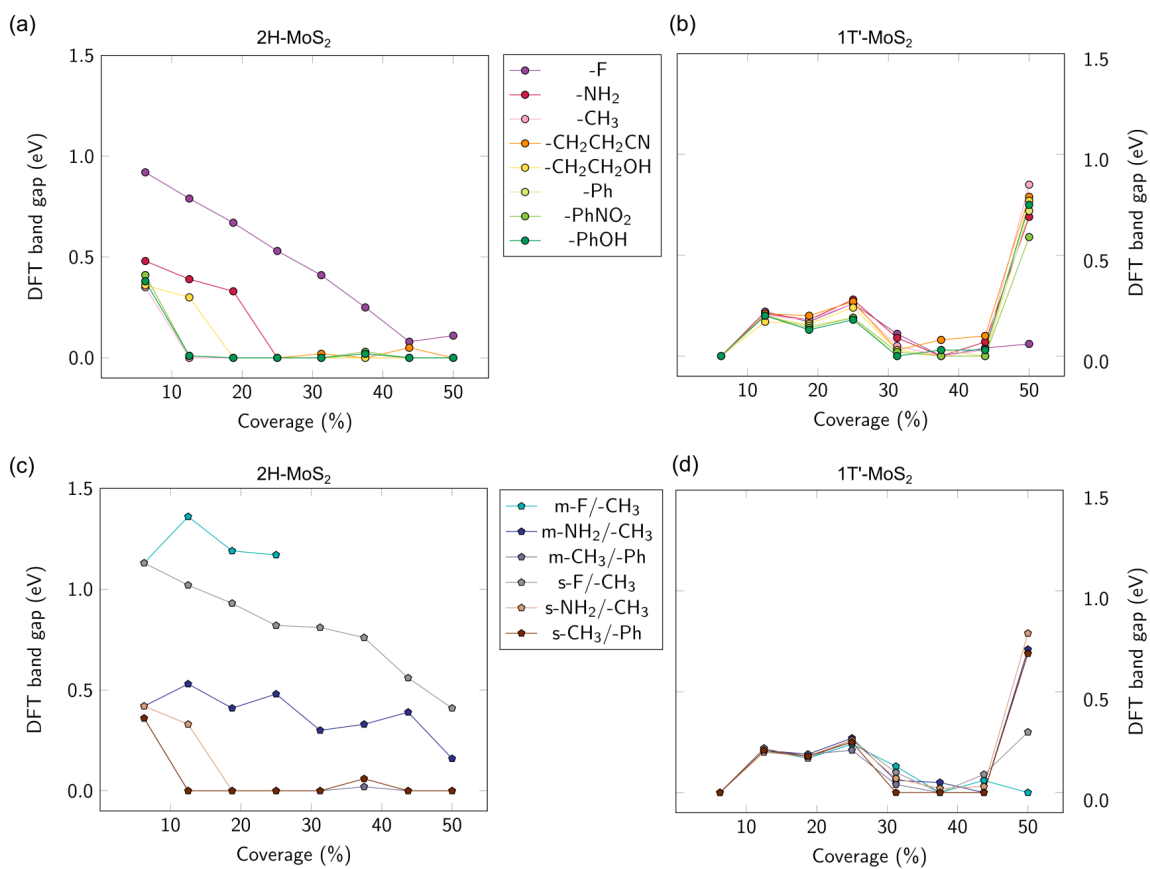

Fig. S6: Total density of states and the projected density of states for the functionalized (a) 2H-MoS<sub>2</sub> and (b) 1T'-MoS<sub>2</sub> calculated by PBE functional.

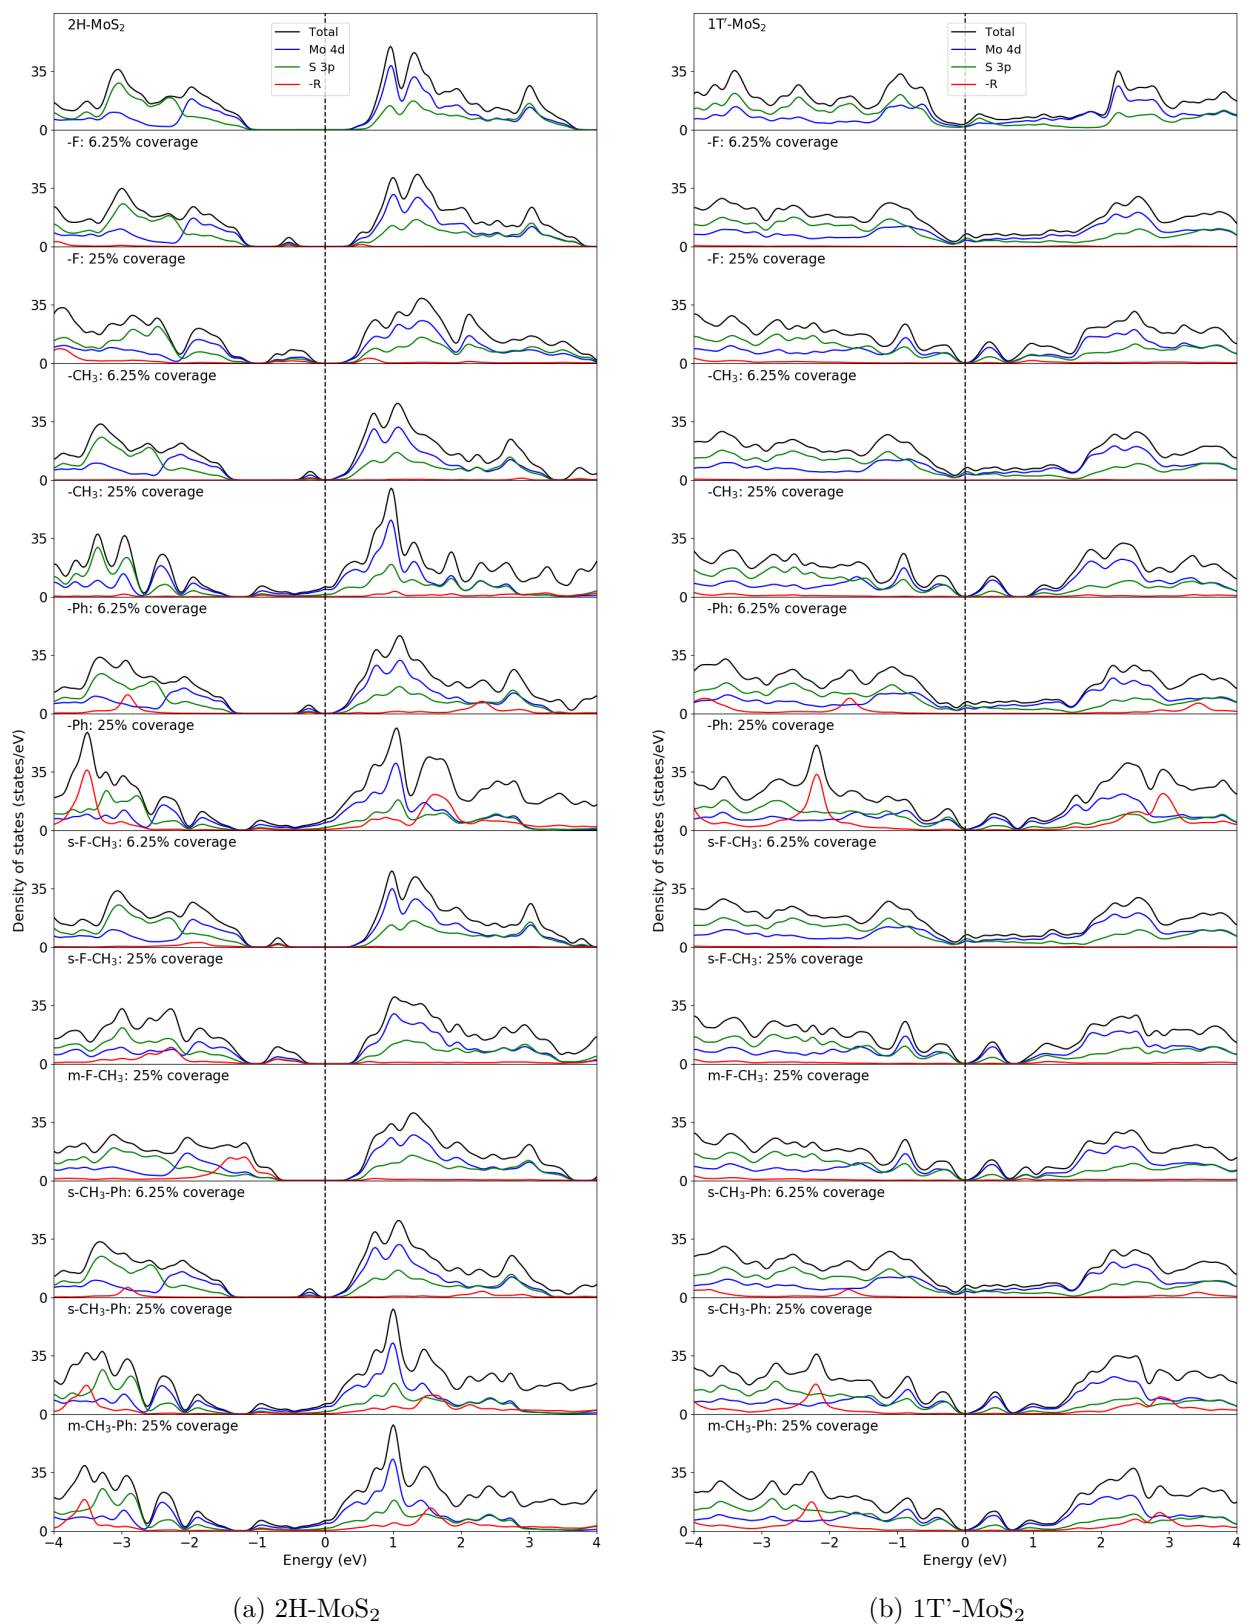

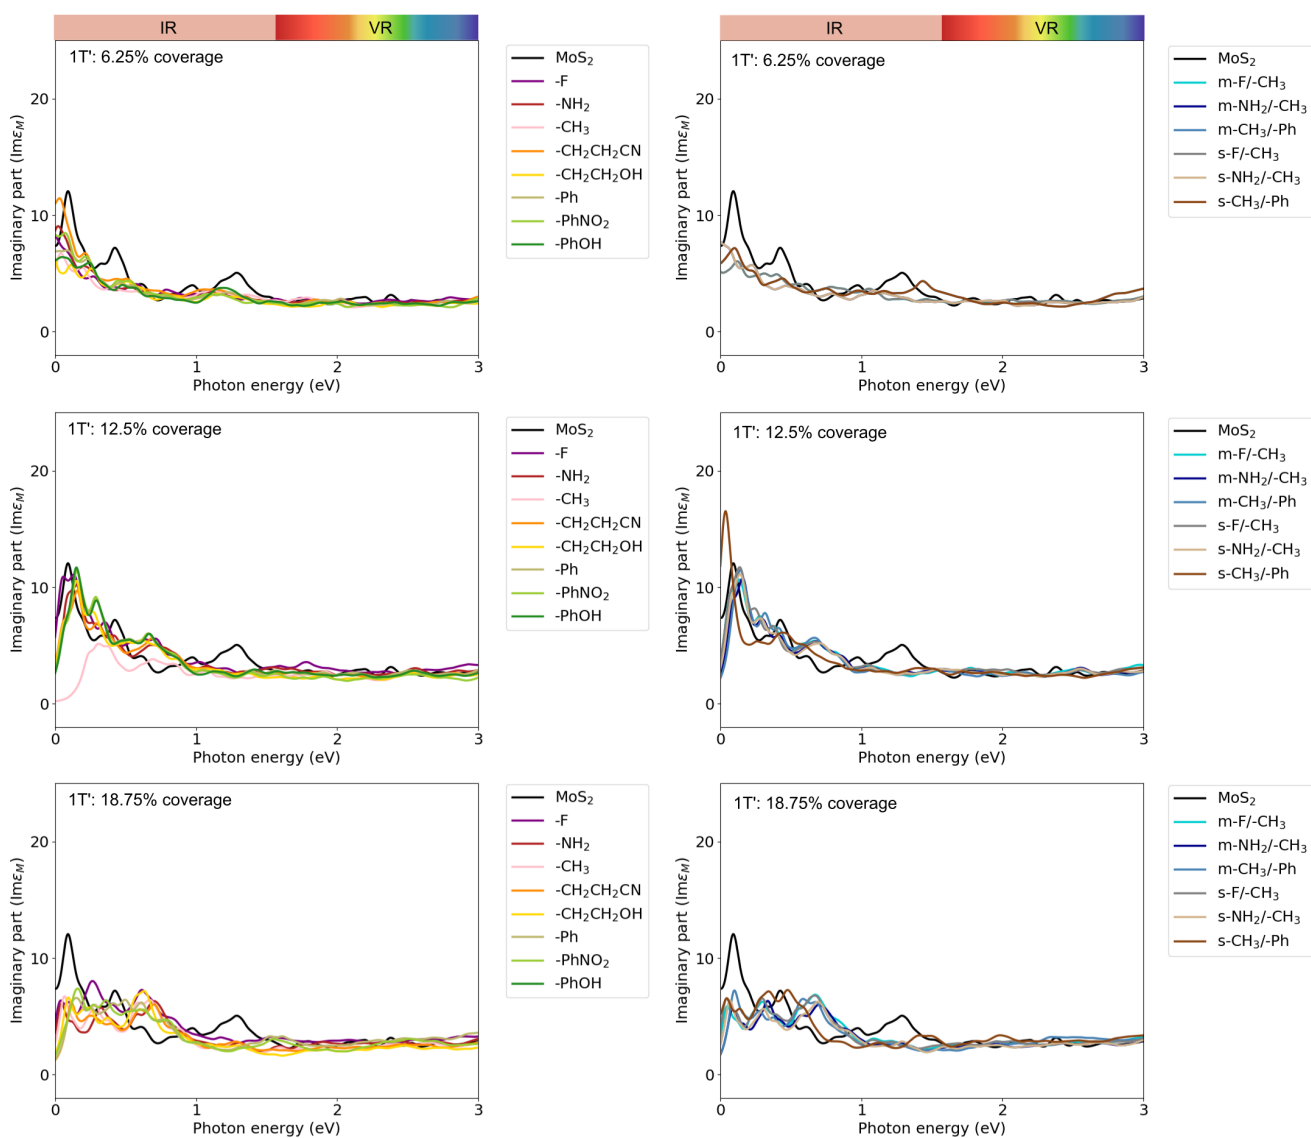

Fig. S7: Optical absorption spectra of the functionalized 1T'-MoS<sub>2</sub> monolayer.

Table S1: The optical band gap ( $E_{\text{opt}}$ ) for the functionalized 2H-MoS<sub>2</sub> at 6.25% coverage. Energies are in eV.

|                  |                      |                                     |                        |                      |                                     |                                     |
|------------------|----------------------|-------------------------------------|------------------------|----------------------|-------------------------------------|-------------------------------------|
|                  | 2H-MoS <sub>2</sub>  | -F                                  | -NH <sub>2</sub>       | -CH <sub>3</sub>     | -CH <sub>2</sub> CH <sub>2</sub> CN | -CH <sub>2</sub> CH <sub>2</sub> OH |
| $E_{\text{opt}}$ | 1.84                 | 1.14                                | 0.55                   | 0.37                 | 0.49                                | 0.37                                |
| $E_{\text{ext}}$ | 0.67                 | 0.67                                | 0.65                   | 0.63                 | 0.60                                | 0.64                                |
|                  | -Ph                  | -PhNO <sub>2</sub>                  | PhOH                   | m-F/-NH <sub>2</sub> | m-NH <sub>2</sub> /-CH <sub>3</sub> | m-CH <sub>3</sub> /-Ph              |
| $E_{\text{opt}}$ | 0.37                 | 0.43                                | 0.37                   | 1.49                 | 0.48                                | 0.17                                |
| $E_{\text{ext}}$ | 0.63                 | 0.59                                | 0.62                   | 0.73                 | 0.63                                | 0.82                                |
|                  | s-F/-NH <sub>2</sub> | s-NH <sub>2</sub> /-CH <sub>3</sub> | s-CH <sub>3</sub> /-Ph |                      |                                     |                                     |
| $E_{\text{opt}}$ | 1.49                 | 0.48                                | 0.17                   |                      |                                     |                                     |
| $E_{\text{ext}}$ | 0.73                 | 0.63                                | 0.82                   |                      |                                     |                                     |
